# Supplementary material for: Novel Drug-like HsrA Inhibitors Exhibit Potent Narrow-Spectrum Antimicrobial Activities against <em>Helicobacter pylori</em>
Source: Preprints.org preprint supplement (doi:10.20944/preprints202409.0421.v1), 2024-09-05
Supplement: Supplementary file 2 [file Table S2. Differential expression analysis.xlsx]

## Sheet: Expression analysis
Table S2. Differential expression analysis of H.pylori 26695 exposed to lethal concentrations of the highly bactericidal HsrA ligand V
Gene ID	log2 Fold Change	p value	p adj	Control-2	Control-1	Sample-2	Sample-1
HPrrnB16S	3.93392	5.66e-206	8.39e-203	3861.04	2877.45	55809.6	47194.9
HP1167	3.2443	3.92e-130	6.46e-128	390.018	534.15	4616	4132.97
HPrrnA23S	3.01449	6.95e-129	1.03e-126	161714	118637	1.18026e+06	1.0852e+06
HPrrnB23S	2.96792	3.28e-124	4.05e-122	160135	117034	1.12675e+06	1.04185e+06
HP0448	2.65118	1.24e-66	3.34e-65	156.556	217.809	1192.09	1155.23
HPrrnA16S	2.6389	1.43e-156	5.29e-154	256276	216855	1.44256e+06	1.50439e+06
HP0488	2.61742	3.67e-131	6.81e-129	2943.67	3637.56	20244.4	20135.2
HP1116	2.599	1.67e-125	2.26e-123	3008.22	3753.13	20663.4	20295.1
HPrrnC5S	2.58434	4.5e-181	2.22e-178	2014.63	2144.75	12521.9	12421.2
HP1218a	2.56921	4.04e-14	1.36e-13	1100.7	679.356	5365.11	5200.62
HPrrnA5S	2.55154	2.63e-187	1.95e-184	2786.43	2722.61	16425.5	15873
HP0871	2.52852	2.37e-144	7.02e-142	5556.38	6425.36	35823.4	33304.3
HP0695	2.31014	1.38e-78	5.39e-77	37710.2	50752.4	229351	209358
HP0439	2.29763	2.51e-70	7.75e-69	241.701	240.775	1176.57	1195.55
HP0696	2.29718	6.29e-89	3.01e-87	26824	34121.2	157898	141640
HP0653	2.24151	2.11e-96	1.36e-94	7076.62	5779.34	31557.2	29242.2
HP0943	2.24147	1.68e-90	8.6e-89	1409.01	1721.73	7674.52	7126.01
HP0310	2.22727	7.37e-112	6.9e-110	6517.69	7678.87	32948.3	33522.5
HP1402	2.17372	1.01e-97	7.12e-96	1284.72	1501.7	6273.64	6294.69
tRNA-Met-1	2.14066	2.18e-17	8.82e-17	41.1991	60.7494	232.775	215.476
HP1291	2.13804	5.61e-83	2.52e-81	1013.5	1213.51	4727.45	5071.34
HP0311	2.11131	1.24e-108	1.02e-106	1483.85	1569.85	6797.03	6396.17
HP1174	2.04005	9.33e-45	1.25e-43	447.696	625.274	2361.61	2047.72
HP0779	2.03945	7.44e-112	6.9e-110	18573.9	20705.2	82029.9	79438.5
HP1100	2.02658	1.06e-92	5.64e-91	1669.25	1902.49	7244.24	7305.34
HPrrnB5S	2.02607	2.85e-102	2.11e-100	2135.48	1959.54	8505.46	8175.59
HP0631	2.02066	1.24e-96	8.37e-95	7654.78	8889.42	33265.7	33861.7
HP0024	2.01964	3.21e-40	3.84e-39	216.295	294.116	1019.98	1046.8
HP1025	1.92069	8.46e-54	1.55e-52	440.143	537.855	1870.67	1829.46
HP0547	1.91744	2.54e-93	1.39e-91	94349.3	108124	384726	380115
HP1069	1.91329	1.06e-94	6.04e-93	10270.9	10582.3	41593.4	36953.5
HP1099	1.89807	1.36e-36	1.38e-35	207.369	188.175	777.328	697.865
HP1044	1.89758	2.42e-65	6.41e-64	14445.8	18035.2	57681.7	63334.7
tRNA-Ala-1	1.89261	1.15e-89	5.7e-88	1521.62	1498.73	5459.63	5755.3
HP0017	1.87772	2.03e-57	4.24e-56	2876.38	3742.02	12393.5	11924.9
tRNA-Met-3	1.87535	1.22e-62	3.11e-61	819.861	959.396	3133.29	3392.01
HP0632	1.8699	7.96e-111	6.94e-109	8427.27	8507.14	30781.3	31114.8
HP0570	1.86823	4.58e-80	1.84e-78	20764.3	24520.5	83239	82085.3
ychF	1.85447	1.14e-104	8.89e-103	7923.95	8290.07	29635.8	28996.2
tRNA-Leu-2	1.82055	4.52e-82	1.97e-80	2272.81	2521.84	8447.62	8485.59
HP1321	1.7971	1.4e-37	1.52e-36	395.511	526.742	1675.98	1526.41
HP0111	1.79365	1.01e-53	1.83e-52	10853.2	13714.6	45384.1	39786.6
HP0697	1.77999	1.19e-57	2.57e-56	3394.8	4077.62	13699.9	11959.6
HP0715	1.75767	5.1e-67	1.4e-65	913.246	910.5	3171.38	2995.82
HP0573	1.74239	5.99e-77	2.22e-75	1555.26	1511.33	5061.8	5199.23
dnaK	1.70478	4.17e-58	9.37e-57	21580.7	26589.7	80023.8	76998.7
amiE	1.69225	6.59e-56	1.27e-54	1853.96	2090.67	6819.61	5926.29
HP0264	1.69046	9.11e-77	3.3e-75	4726.9	5205.19	16116.5	15938.3
HP0110	1.68732	1.74e-48	2.66e-47	7294.29	9170.94	28161.6	24863.2
dnaE	1.66868	8.79e-68	2.56e-66	13709.7	15866.7	46598.8	47428.4
HP0751	1.65851	5.27e-42	6.62e-41	439.457	498.59	1436.15	1523.63
HP1342	1.65744	5.67e-54	1.05e-52	6325.43	7736.66	21456.2	22900.3
tRNA-Leu-3	1.65422	5.1e-08	1.21e-07	41.1991	34.8198	129.79	109.823
HP1398	1.6534	1.23e-48	1.93e-47	833.594	959.396	2952.72	2685.81
maf	1.63876	9.2e-68	2.62e-66	1882.8	2012.14	6170.66	5956.88
HP0875	1.63845	6.34e-71	2e-69	17173.1	18985.7	58191	54380.6
HP1045	1.63648	1.07e-74	3.78e-73	5467.11	5891.95	18004.1	17310.4
HP0227	1.62563	8.77e-49	1.4e-47	6144.15	7653.69	20472.9	22100.9
HP0633	1.62503	1.33e-64	3.45e-63	2178.06	1978.06	6461.27	6360.03
HP0723	1.62197	1.06e-34	1e-33	2078.49	2918.94	7551.79	7826.65
fliD	1.58243	1.83e-51	3.19e-50	1860.14	2200.31	6128.33	6029.16
HP0520	1.56948	2.11e-72	6.97e-71	3567.15	3602	10745.7	10531.9
HP1210	1.56171	3.84e-70	1.16e-68	4890.33	5191.11	14676.1	15083.3
HP0133	1.5467	3.2e-53	5.65e-52	1648.65	1631.34	5075.91	4506.93
HP0330	1.53875	9.18e-74	3.1e-72	6310.32	6353.5	18283.4	18510.1
HP0262	1.53785	9.55e-41	1.18e-39	606.999	685.283	1921.45	1829.46
HP0251	1.53286	3.28e-47	4.63e-46	3068.64	3705.71	9583.28	10016.2
HP0019	1.52559	9.26e-60	2.15e-58	3003.41	3307.88	9186.86	8981.88
HP1391	1.52228	1.09e-19	4.95e-19	210.115	291.894	766.042	674.232
tRNA-Arg-3	1.51688	4e-48	6e-47	2313.33	2727.06	7049.56	7372.07
glk	1.49961	1.05e-54	1.99e-53	1405.57	1351.3	3914.85	3881.35
HP0944	1.4971	8.94e-34	8.08e-33	567.174	694.173	1781.79	1776.64
HP1101	1.49627	1.33e-44	1.75e-43	782.095	831.23	2329.16	2221.49
HP0691	1.48459	2.16e-38	2.44e-37	1909.58	2391.45	6190.41	5842.88
HP1468	1.46688	4.72e-56	9.6e-55	6981.87	7818.15	20101.9	20806.7
HP0812	1.46463	1.04e-23	5.93e-23	394.824	520.815	1172.34	1352.63
groEL	1.45522	1.31e-48	2.03e-47	125554	149340	378831	374920
tRNA-Asp-1	1.4539	2.03e-44	2.65e-43	1117.87	1240.92	3154.46	3305.82
HP0261	1.45247	2.38e-05	4.61e-05	35.0192	28.893	97.3423	77.8495
HP0510	1.45229	6e-56	1.17e-54	2071.63	2055.11	5535.82	5756.69
HP0317	1.45037	1.08e-57	2.36e-56	29769.7	33271.4	85284.6	86991.2
HP1440	1.44574	4.4e-37	4.73e-36	883.72	1049.78	2590.15	2674.69
HP0730	1.44393	9.02e-35	8.58e-34	676.351	745.292	2056.89	1810
tRNA-Arg-1	1.4433	1.73e-30	1.37e-29	469.669	553.412	1348.68	1431.87
tRNA-Glu-1	1.43599	9.79e-07	2.14e-06	957.191	1444.65	3158.69	3339.19
HP0090	1.42435	3.49e-62	8.62e-61	7583.37	7257.33	19900.2	19932.2
pgi	1.42341	3.52e-32	3.02e-31	579.533	686.765	1711.25	1683.5
HP0454	1.41923	6.73e-12	1.96e-11	96.1311	122.981	275.098	310.008
tRNA-Asn-1	1.41791	6.24e-07	1.39e-06	901.573	1348.34	3040.18	2970.79
HP1024	1.41494	4.9e-27	3.26e-26	1269.62	1746.92	4003.73	4037.05
tRNA-Pro-1	1.41482	4.76e-27	3.18e-26	354.312	398.575	973.423	1032.9
HP0424	1.41102	3.71e-34	3.42e-33	535.588	570.452	1448.85	1491.65
amiF	1.40405	1.25e-34	1.18e-33	3634.44	4645.85	10854.4	11056
HP0626	1.3933	1.8e-50	3e-49	3755.98	4165.78	10405.8	10401.2
HP0020	1.38257	7.4e-49	1.19e-47	2176	2035.85	5556.98	5425.83
tRNA-Ser-2	1.37002	1.44e-20	6.88e-20	267.794	300.043	679.985	786.836
HP1243	1.35202	8.73e-50	1.42e-48	24588.3	27541.7	65728.6	67341.2
HP0759	1.34973	1.55e-47	2.25e-46	2481.56	2617.41	6320.2	6674.2
HP0151	1.34008	5.73e-47	8.01e-46	1916.44	1948.43	4974.33	4809.99
panC	1.3379	2.91e-27	1.99e-26	2427.31	3195.27	6757.53	7452.7
HP0692	1.32852	6.53e-31	5.41e-30	1051.95	1211.28	3027.49	2655.22
HP0613	1.32739	1.13e-19	5.11e-19	283.587	343.753	821.061	752.082
tRNA-Gln-1	1.32728	0.000593357	0.000990933	34.3325	20.7437	70.5379	68.1183
HP1102	1.3245	1.4e-23	7.95e-23	395.511	371.164	1015.75	905
HP1467	1.32245	2.94e-36	2.96e-35	1962.45	2311.44	5253.66	5432.78
HP1470	1.31193	4.06e-45	5.52e-44	1889.66	1846.93	4621.64	4655.68
HP1504	1.31125	2.27e-35	2.2e-34	2658.71	3167.12	7041.09	7413.77
HP1411	1.30719	9.28e-27	6.12e-26	539.021	626.015	1410.76	1470.8
HP0472	1.30137	6.3e-30	4.86e-29	5719.11	7192.14	16742.9	15076.4
HP0469	1.29478	2.65e-33	2.37e-32	1023.11	923.095	2442.02	2334.09
HP0845	1.29176	5.11e-22	2.6e-21	326.846	343.753	835.169	806.298
HP1143	1.28169	5.92e-17	2.34e-16	220.415	242.257	545.963	578.31
HP0389	1.28117	2.07e-38	2.36e-37	8445.12	9848.81	22749.9	21708.9
aspA	1.27592	2.42e-45	3.36e-44	7299.1	8018.92	18400.5	18690.8
tRNA-Gly-2	1.26494	1.27e-12	3.85e-12	166.856	145.206	366.797	383.687
HP1180	1.26427	4.95e-37	5.2e-36	3953.74	4595.47	10349.3	10184.4
HP0541	1.26313	2.52e-47	3.59e-46	5145.76	5407.44	12743.4	12585.2
HP1178	1.25091	6.3e-34	5.73e-33	1415.19	1594.3	3525.48	3635.29
HP0629	1.23618	7.23e-36	7.1e-35	2551.59	2847.81	6141.03	6576.89
HP0456	1.23563	0.0894262	0.114228	6.86651	7.40847	15.5183	18.0722
HP0243	1.23492	4.37e-48	6.49e-47	27637	27904	67269.2	63457.1
HP0942	1.23309	3.76e-27	2.53e-26	787.589	886.793	2051.24	1883.68
HP1453	1.23188	1.79e-35	1.74e-34	1621.87	1752.1	4074.27	3849.38
HP1401	1.22087	1.72e-22	8.97e-22	480.656	484.514	1059.48	1189.99
HP0426	1.21996	2.83e-22	1.45e-21	430.53	460.807	1066.53	1009.26
HP1289	1.21656	4.04e-28	2.87e-27	1424.8	1655.05	3765.31	3390.62
HP1207	1.21534	1.16e-19	5.27e-19	377.658	434.136	977.655	906.39
HP1461	1.21238	2.33e-39	2.71e-38	2734.24	2764.1	6157.96	6582.45
HP1168	1.20836	3.5e-31	2.92e-30	2523.44	2967.09	6481.02	6204.33
HP1327	1.20037	1.64e-19	7.34e-19	361.178	397.094	847.866	893.879
HP1290	1.19934	7.7e-23	4.14e-22	648.885	777.148	1667.52	1605.65
HP1208	1.19884	9.28e-37	9.56e-36	1956.95	2066.22	4546.87	4687.65
HP0556	1.19728	6.38e-09	1.58e-08	132.524	106.682	293.438	255.791
HP0078	1.19467	7.74e-12	2.25e-11	164.796	204.474	413.352	430.953
HP0844	1.19425	8.95e-23	4.76e-22	525.975	568.229	1304.95	1198.33
HP0729	1.19205	6.91e-31	5.66e-30	1005.94	974.213	2257.21	2267.37
HP0140	1.18584	1.92e-38	2.21e-37	2390.92	2467.02	5571.08	5480.05
HP0788	1.18504	1.79e-40	2.18e-39	13165.8	14313.2	30600.8	31876.6
HP1070	1.17422	7.07e-19	3.07e-18	422.977	403.761	993.174	873.026
HP0983	1.17025	3.47e-27	2.35e-26	1075.3	1009.03	2466.01	2225.66
HP0690	1.16938	1.75e-25	1.1e-24	2938.87	3664.23	7582.83	7266.42
HP1233	1.16349	5.08e-18	2.1e-17	682.531	878.644	1635.07	1860.05
HP0056	1.16275	2.69e-43	3.44e-42	8098.36	8135.24	18172	18172.3
HP0896	1.1627	3.68e-33	3.26e-32	17641.4	20434.8	41668.2	43573.5
tRNA-Ala-2	1.15745	1.13e-21	5.68e-21	1774.99	2301.07	4446.71	4643.17
HP0693	1.15444	9.36e-31	7.63e-30	2105.96	2196.61	5066.03	4511.1
HP0134	1.15365	8.96e-32	7.55e-31	1430.29	1429.83	3265.91	3097.3
HP0425	1.14922	7.01e-19	3.05e-18	425.037	489.7	1015.75	1012.04
HP1395	1.14745	1.37e-34	1.27e-33	4794.88	5076.28	11442.7	10423.5
HP0710	1.14368	8.11e-38	8.91e-37	3313.78	3381.96	7484.07	7309.51
HP0682	1.1363	3.41e-23	1.88e-22	683.218	720.844	1606.85	1479.14
HP1324	1.13144	1.99e-21	9.75e-21	1397.33	1770.62	3518.43	3419.82
HP1288	1.12472	4.36e-19	1.91e-18	648.198	800.855	1602.62	1555.6
HP0780	1.12186	1.01e-30	8.17e-30	1538.1	1609.12	3478.93	3369.77
HP1028	1.12058	3.13e-27	2.13e-26	1028.6	1002.37	2168.34	2247.9
HP1588	1.11829	2.13e-40	2.57e-39	16004.5	15986.7	35417.1	34032.7
HP0096	1.11689	8.54e-21	4.11e-20	1262.75	1590.6	3154.46	3031.96
tRNA-Met-2	1.11312	1.28e-06	2.76e-06	85.1447	123.721	228.543	222.427
HP0663	1.11136	1.82e-27	1.26e-26	1094.52	1082.38	2305.18	2398.04
HP0874	1.11112	1.45e-30	1.16e-29	3939.32	3767.2	8810.18	7837.78
HP0681	1.11112	1.01e-19	4.64e-19	2710.21	3591.62	6911.3	6699.23
HP1456	1.11064	1.64e-28	1.18e-27	6571.94	7496.63	15947.2	14431.3
HP0601	1.10925	2.17e-28	1.56e-27	48026.4	57337.1	115098	112205
HP0331	1.10669	4.5e-24	2.62e-23	1684.35	1446.87	3505.73	3239.09
HP1400	1.10522	1.84e-32	1.58e-31	9396.82	10222.2	20183.7	22021.7
HP0113	1.10266	2.61e-25	1.63e-24	1247.64	1420.2	2880.77	2847.07
HP0438	1.10114	8.54e-21	4.11e-20	2912.09	2315.89	5321.38	5895.71
HP0746	1.09928	4.63e-30	3.6e-29	1700.83	1760.25	3794.94	3620
HP0818	1.09741	1.63e-30	1.3e-29	1921.94	2046.22	4192.77	4297.01
HP0242	1.0945	2.43e-22	1.26e-21	1497.59	1516.51	3522.66	2913.8
HP1409	1.09248	8e-18	3.29e-17	438.77	468.215	936.743	996.751
HP0091	1.09153	1.49e-25	9.41e-25	2156.08	1852.86	4240.74	4303.96
HP0724	1.08819	1.62e-21	8.06e-21	2001.59	2501.1	4838.9	4732.14
HP1050	1.08592	7.12e-37	7.44e-36	6023.3	6137.91	12902.8	12911.9
HP0457	1.08461	0.116026	0.145081	7.55316	9.63101	15.5183	20.8525
pgk	1.08401	6.46e-33	5.71e-32	4540.82	4884.4	9813.23	10166.3
tRNA-His-1	1.08259	1.09e-15	4.03e-15	371.478	392.649	850.687	767.374
HP1104	1.08131	2.49e-29	1.87e-28	9192.19	10597.1	20821.4	21049.9
HP0132	1.08071	4e-23	2.2e-22	1034.1	1150.53	2395.47	2224.27
HP1399	1.07643	9.47e-25	5.71e-24	1882.8	2056.59	4411.44	3895.25
HP0407	1.07196	6.88e-31	5.66e-30	6232.73	6936.55	14030	13654.2
HP0382	1.07033	9.81e-34	8.82e-33	3541.06	3545.69	7512.29	7369.29
HP1517	1.06519	1.64e-28	1.18e-27	1947.34	1995.84	3985.39	4265.04
HP0980	1.06305	2.29e-07	5.25e-07	111.237	129.648	263.812	239.109
HP1334	1.0596	2.14e-34	1.99e-33	19674.6	19753.9	39550.6	42632.3
HP1066	1.05342	1.86e-24	1.1e-23	1177.61	1279.44	2530.9	2567.64
HP0309	1.05095	3.54e-25	2.17e-24	2385.43	2644.82	5459.63	4961.51
HP1086	1.04945	2.22e-05	4.3e-05	77.5915	71.8621	153.773	155.699
HP0444	1.04628	1.1e-05	2.19e-05	87.8913	120.758	245.472	184.893
HP0774	1.04528	1.47e-28	1.07e-27	2013.95	1955.83	4157.5	4035.66
HP0714	1.0402	3.15e-19	1.38e-18	624.852	606.753	1247.11	1285.91
HP0542	1.03831	2.17e-24	1.28e-23	1543.59	1556.52	3349.14	3018.06
HP0034	1.0383	2.82e-29	2.11e-28	2364.83	2395.9	4982.8	4794.69
HP1326	1.03624	1.62e-10	4.37e-10	234.835	296.339	565.714	522.704
HP1403	1.03538	1.72e-26	1.13e-25	2027.68	2220.32	4325.38	4380.42
HP0218	1.03231	2.68e-26	1.71e-25	1667.87	1726.91	3560.75	3382.28
gatA	1.03143	1.87e-29	1.42e-28	4302.55	4688.82	9208.02	9169.56
htpG	1.03004	7.27e-30	5.55e-29	5235.03	5699.33	11256.4	11071.3
HP1114	1.02951	3.7e-27	2.5e-26	2807.03	3021.17	5751.66	6144.55
HP0357	1.02766	6.79e-23	3.66e-22	2863.33	3319.73	6033.81	6569.94
HP1186	1.02548	1.36e-21	6.8e-21	2347.66	2810.03	5355.24	5142.24
HP0108	1.0251	5.88e-28	4.15e-27	2805.66	3036.73	5908.26	5980.51
HP0380	1.02369	6.85e-25	4.15e-24	1363.69	1435.76	2832.8	2858.19
HP0686	1.02291	1.26e-22	6.65e-22	2182.86	2458.87	4963.05	4468
HP1412	1.02076	1.83e-18	7.82e-18	970.238	875.681	1994.81	1751.61
HP0453	1.01948	2.55e-09	6.46e-09	179.216	192.62	385.137	368.395
lpxC	1.01543	8.14e-23	4.36e-22	7587.49	9108.71	17177.4	16572.2
HP0232	1.01415	3.06e-23	1.71e-22	3159.97	3704.97	6902.84	6960.58
HP1198	1.00898	7.58e-33	6.65e-32	54244	56125.8	108283	113834
HP0761	1.00818	8.16e-24	4.69e-23	1902.02	1781.74	3859.83	3550.49
greA	1.0074	9.14e-23	4.84e-22	1592.34	1559.48	3342.09	2994.42
alaS	1.0004	9.47e-28	6.62e-27	2441.04	2412.94	4892.51	4818.33
valS	0.998873	8.52e-29	6.22e-28	3594.62	3438.27	7007.24	7048.16
HP1523	0.993341	6.53e-20	3.02e-19	812.995	809.745	1605.44	1625.11
HP1459	0.992704	2.88e-27	1.98e-26	2456.15	2398.12	4830.44	4829.45
ruvC	0.98523	4.18e-13	1.31e-12	539.021	448.953	1025.62	931.414
HP1393	0.984194	1.09e-17	4.44e-17	734.716	824.562	1537.73	1545.87
HP0982	0.983116	0.000376779	0.000642996	63.8585	60.0086	110.039	134.846
HP0822	0.979903	4.51e-23	2.47e-22	1407.63	1455.02	2774.96	2870.7
HP0265	0.976386	1.87e-21	9.18e-21	1430.98	1467.62	2989.4	2713.61
HP1017	0.975911	4.49e-22	2.3e-21	1369.87	1408.35	2824.34	2639.93
HP1560	0.974816	1.49e-22	7.8e-22	1354.08	1383.9	2633.89	2746.97
ispG	0.969455	2.11e-20	1e-19	2440.36	2878.19	5156.32	5256.23
glyS	0.969147	5.86e-26	3.72e-25	2443.1	2435.9	4844.54	4707.11
minE	0.968657	2.73e-18	1.15e-17	825.354	906.796	1699.96	1689.06
HP0565	0.966104	3.46e-28	2.46e-27	4685.71	4645.11	9281.38	8947.13
HP0097	0.958354	6.12e-27	4.05e-26	4302.55	4272.46	8553.43	8108.86
ureB	0.950264	1.33e-23	7.57e-23	195761	221842	388348	418554
HP0059	0.949147	6.98e-07	1.55e-06	164.796	203.733	311.778	398.979
HP1037	0.948913	1.12e-20	5.38e-20	13399.3	16048.2	28776.6	28067.5
HP1026	0.946013	5.89e-17	2.33e-16	843.894	955.692	1729.59	1736.32
HP1237	0.945402	9.9e-25	5.95e-24	3002.72	3196.01	6022.53	5913.78
tRNA-Gly-1	0.945163	3.26e-20	1.53e-19	6278.74	5363.73	11647.2	10771
HP0470	0.94334	2.77e-26	1.76e-25	3605.6	3520.5	6812.55	6891.07
fliS	0.938872	3.8e-08	9.06e-08	189.516	200.769	389.369	358.664
HP0342	0.937555	2.71e-07	6.17e-07	177.156	230.403	365.386	414.27
HP0312	0.93432	1.41e-21	7.02e-21	1676.8	1751.36	3356.19	3194.61
HP0116	0.934243	8.06e-18	3.3e-17	916.679	998.661	1829.75	1829.46
HP0300	0.931089	1.36e-19	6.13e-19	1315.62	1347.6	2642.35	2435.58
HP0172	0.924791	1.88e-14	6.43e-14	701.757	787.52	1335.99	1490.26
HP0584	0.923485	1.29e-13	4.19e-13	642.705	770.48	1354.33	1324.83
HP0849	0.921318	0.00331015	0.00507647	48.7522	47.4142	101.575	80.6298
HP0731	0.919547	2.02e-13	6.46e-13	612.493	729.734	1280.97	1256.71
HP1382	0.908302	7.13e-05	0.00013177	96.1311	92.6058	177.756	176.552
HP1118	0.908229	2.35e-18	9.97e-18	9674.91	11649.1	20511	19506.9
ligA	0.907519	2.46e-20	1.16e-19	1998.15	2145.49	3766.72	4005.08
HP0035	0.901899	3.06e-16	1.16e-15	1295.02	1515.77	2671.98	2578.76
HP1410	0.901483	1.18e-09	3.05e-09	279.467	292.634	530.445	537.996
HP1424	0.901367	2.64e-21	1.29e-20	2905.91	3086.37	5391.92	5799.79
HP0442	0.900442	0.220581	0.261697	6.17986	10.3719	14.1076	16.682
HP0260	0.900385	2.33e-06	4.89e-06	151.063	142.983	280.741	268.303
HP0235	0.897866	9.01e-19	3.89e-18	5940.9	7042.49	12095.8	12094.5
HP1582	0.892092	1.29e-16	5e-16	1174.17	1116.46	2231.82	2019.92
tRNA-Thr-2	0.891207	7.68e-05	0.000140843	104.371	94.8284	180.577	189.063
HP0392	0.888705	2.72e-25	1.69e-24	6383.11	6343.87	11777	11787.2
HP0301	0.887286	2.62e-18	1.11e-17	1379.48	1416.5	2677.62	2493.96
pyrG	0.886777	1.24e-22	6.57e-22	4210.54	4250.98	7554.61	8090.79
HP1162	0.884979	9.66e-17	3.77e-16	948.265	943.839	1770.5	1723.81
tRNA-Phe-1	0.884197	1.48e-07	3.42e-07	253.374	345.975	568.536	536.605
HP1458	0.882168	3.07e-25	1.9e-24	10538	10732.6	19946.7	19258
HP0716	0.878748	1.34e-06	2.9e-06	192.949	173.358	365.386	308.618
HP0049	0.877628	7.47e-20	3.44e-19	1939.79	2038.07	3724.4	3583.86
fumC	0.877508	1.32e-15	4.84e-15	6876.12	8596.78	14103.3	14321.5
gltA	0.876518	1.73e-22	8.99e-22	10797.6	11846.9	20546.3	21026.3
HP0423	0.874295	1.15e-12	3.5e-12	821.921	782.334	1604.03	1337.34
HP1055	0.865912	1.96e-13	6.28e-13	635.839	616.384	1121.55	1160.79
HP0250	0.865567	5.67e-16	2.12e-15	1275.8	1417.98	2370.07	2537.06
HP1179	0.861768	3.58e-12	1.06e-11	1877.3	2468.5	3866.89	4028.71
glyQ	0.861398	2.07e-17	8.37e-17	1481.11	1588.38	2862.43	2713.61
HP0899	0.860588	2.46e-14	8.37e-14	3015.77	3755.35	5983.03	6309.98
HP1005	0.858071	8.08e-14	2.66e-13	870.673	1000.14	1667.52	1722.42
HP1344	0.857548	1.02e-19	4.68e-19	2544.73	2381.82	4462.23	4465.22
HP1060	0.849907	1.98e-12	5.98e-12	687.337	712.694	1345.86	1177.47
HP1038	0.846734	2.8e-13	8.84e-13	7095.85	9202.05	14742.4	14566.2
HP0381	0.843931	1.49e-15	5.42e-15	1067.06	1032.74	1841.04	1928.16
HP1386	0.84274	4.58e-17	1.83e-16	1446.09	1442.43	2513.97	2666.34
HP1329	0.841284	3.61e-16	1.36e-15	1273.05	1377.23	2396.88	2350.78
HP1387	0.840605	1.4e-18	6.03e-18	2434.18	2262.55	4174.43	4237.24
HP0390	0.839074	7.19e-17	2.82e-16	5903.82	6386.1	11774.2	10210.8
HP0654	0.825724	1.72e-17	7.01e-17	1650.71	1698.76	2978.11	2958.28
HP0895	0.815591	2.07e-05	4.02e-05	151.75	156.319	287.795	254.401
HP1455	0.815067	9.66e-16	3.57e-15	2783.68	3104.15	5424.37	4933.71
HP1437	0.812	0.000264844	0.000458301	106.431	107.423	200.328	175.161
HP0876	0.811864	3.2e-14	1.09e-13	3375.58	4077.62	6630.56	6451.78
gidA	0.811839	2.64e-19	1.16e-18	5973.18	6321.64	10456.5	11125.5
tRNA-Arg-2	0.810287	4.09e-10	1.08e-09	584.34	592.677	1122.96	941.145
HP0080	0.805243	5.7e-14	1.9e-13	1693.28	1980.28	3209.47	3208.51
HP0459	0.800038	0.00050013	0.000842473	93.3845	111.868	172.112	184.893
HP1107	0.79991	1.34e-16	5.17e-16	2565.33	2413.68	4484.8	4184.41
HP0207	0.792636	1.15e-11	3.31e-11	7135.68	9258.36	14544.9	13851.6
HP1156	0.792186	1.15e-17	4.67e-17	4178.96	4397.67	7155.37	7695.98
HP1553	0.791001	6.67e-17	2.62e-16	2103.9	2035.85	3601.67	3561.61
HP0366	0.788388	7.01e-16	2.61e-15	2092.91	2247.73	3844.32	3651.98
HP1049	0.786063	6.96e-14	2.31e-13	1100.01	1155.72	1975.06	1914.26
rnhB	0.783919	3.33e-16	1.26e-15	2669.01	2930.79	4855.83	4784.96
HP0996	0.783357	2.11e-07	4.85e-07	313.799	281.522	513.516	511.582
HP0789	0.782951	1.02e-05	2.03e-05	190.889	179.285	314.599	322.519
HP0497	0.778056	1.73e-18	7.41e-18	4758.49	4828.1	8413.76	8025.45
HP0922	0.776842	4.14e-17	1.66e-16	3113.27	3317.51	5463.87	5553.73
HP0920	0.774298	2.33e-14	7.95e-14	18017.7	21452.7	34603.1	32903.9
HP1328	0.773249	6.13e-06	1.25e-05	202.562	230.403	383.726	355.883
HP0879	0.771224	6.45e-12	1.88e-11	797.888	834.934	1364.2	1422.14
HP1491	0.763433	4.49e-14	1.51e-13	2881.19	3321.22	5312.92	5214.53
HP0571	0.760312	5.43e-14	1.83e-13	1862.88	2062.52	3254.62	3393.4
HP0468	0.757905	3.84e-16	1.45e-15	2483.62	2398.86	4137.75	4119.07
HP0532	0.757712	5.79e-12	1.69e-11	1046.46	959.396	1732.41	1659.86
HP0211	0.752132	4.06e-12	1.2e-11	1360.26	1247.59	2090.74	2302.12
HP0333	0.745744	3.33e-14	1.13e-13	2487.05	2520.36	3975.52	4420.74
HP1527	0.743216	4.39e-15	1.56e-14	5920.99	6682.44	10560.9	10534.7
HP1027	0.741934	4.58e-10	1.2e-09	695.577	670.466	1093.34	1191.38
obgE	0.741304	8.94e-13	2.73e-12	1617.06	1818.78	2842.68	2899.89
HP1506	0.739062	1.51e-14	5.19e-14	2079.18	2035.11	3525.48	3341.97
thiE	0.732061	3.11e-07	7.05e-07	383.838	350.42	636.252	583.871
pyrB	0.731552	6.92e-09	1.71e-08	501.255	530.446	860.562	852.174
HP0137	0.731138	1.9e-13	6.11e-13	2721.2	2439.61	4191.36	4376.25
HP1454	0.725529	2.92e-15	1.04e-14	11018.7	12157.3	19667.4	18653.3
secA	0.724073	1.55e-15	5.62e-15	3680.45	3899.82	6249.66	6271.05
HP0959	0.722007	7.52e-13	2.31e-12	1592.34	1726.91	2749.57	2724.73
HP1541	0.72072	5.69e-16	2.13e-15	4644.51	4444.34	7419.18	7559.74
HP0614	0.720061	2.91e-09	7.32e-09	598.76	588.973	1000.23	956.437
HP0846	0.717023	1.46e-05	2.88e-05	222.475	233.367	368.208	380.906
HP1561	0.716248	1.82e-13	5.87e-13	7942.49	9146.49	13785.9	14288.2
HP0815	0.715526	8.35e-11	2.31e-10	1038.22	1039.41	1616.73	1794.71
HP0217	0.712141	6.02e-13	1.87e-12	1712.51	1791.37	2941.43	2798.41
gpsA	0.710818	4.93e-13	1.54e-12	3363.22	3814.62	5810.91	5936.02
HP0829	0.705568	2.55e-15	9.15e-15	4012.79	4122.81	6722.26	6544.92
HP1362	0.702824	1.41e-11	4.02e-11	1507.89	1372.79	2324.93	2364.68
HP0717	0.697715	6.24e-11	1.74e-10	1263.44	1412.79	2166.92	2172.83
HP0783	0.691138	1.19e-10	3.27e-10	3937.94	4787.35	7101.76	6984.21
HP0060	0.688958	3.16e-07	7.14e-07	475.162	549.708	860.562	791.006
HP0255	0.688935	1.28e-15	4.7e-15	7683.62	7715.92	12170.6	12654.7
HP0228	0.688805	9.06e-09	2.21e-08	1591.66	2015.1	2862.43	2949.94
HP0055	0.687134	9.3e-14	3.05e-13	2606.53	2630.75	4260.49	4171.9
HP0914	0.682824	2.81e-12	8.39e-12	3142.8	3537.54	5355.24	5367.44
HP0036	0.680854	7.97e-14	2.63e-13	3361.84	3216.76	5290.34	5256.23
HP1111	0.676688	4.36e-15	1.55e-14	9083.02	8716.8	14409.5	14043.5
HP1056	0.674367	9.03e-11	2.49e-10	1230.48	1197.95	1896.06	1979.6
HP0192	0.673029	9.26e-15	3.22e-14	19046.3	20477.7	31186.2	31830.7
HP0079	0.665259	3.95e-08	9.41e-08	825.354	983.844	1437.56	1430.48
HP0062	0.661764	0.0899664	0.114819	33.6459	31.8564	55.0196	48.6559
HP1516	0.660473	0.000804836	0.00132472	170.289	162.986	294.848	232.158
pdxA	0.659869	1.33e-10	3.62e-10	1404.2	1320.93	2142.94	2163.1
hisS	0.658458	8.18e-13	2.51e-12	2751.41	2711.5	4355.01	4267.82
HP0131	0.65658	0.0140737	0.0201655	73.4716	96.3101	115.682	151.528
HP1507	0.65658	8.86e-14	2.91e-13	4459.8	4392.48	6942.34	7012.01
HP0299	0.653853	4.11e-10	1.08e-09	1803.15	2038.81	3105.08	2938.82
ileS	0.651864	9.56e-15	3.31e-14	10642.4	10555.6	16617.3	16689
HP0233	0.648631	6.86e-13	2.12e-12	3249.23	3321.96	5152.09	5149.19
HP0231	0.648605	3.75e-11	1.05e-10	3497.8	3902.78	5980.2	5620.45
HP0092	0.648528	8.55e-12	2.47e-11	2372.38	2315.89	3583.33	3765.97
HP0884	0.645501	3.78e-10	1e-09	1373.99	1460.21	2165.51	2267.37
HP1189	0.643242	5.18e-12	1.52e-11	2595.54	2504.06	3960	4005.08
HP0950	0.641104	8.84e-12	2.55e-11	2444.48	2565.55	3906.39	3906.38
HP0852	0.64015	8.83e-09	2.17e-08	840.461	857.9	1323.29	1323.44
HP1503	0.638779	1.31e-10	3.56e-10	1547.71	1589.86	2475.88	2409.16
HP1502	0.635545	6.26e-09	1.56e-08	964.058	957.174	1533.49	1451.34
eno	0.633875	4.05e-13	1.27e-12	6927.62	6643.91	10386	10673.7
HP0817	0.631565	2.3e-06	4.83e-06	489.582	480.809	703.968	799.347
HP0105	0.62543	2.44e-10	6.5e-10	2322.25	2528.51	3851.37	3631.12
HP0603	0.622136	0.000141529	0.000252572	273.974	253.37	378.083	433.733
flgB	0.617975	8.85e-09	2.17e-08	2791.24	3285.65	4857.24	4468
HP1543	0.617229	2.26e-08	5.42e-08	1224.3	1168.32	1726.77	1943.46
HP1471	0.610263	9.56e-07	2.09e-06	591.206	584.528	860.562	934.194
flgE	0.609888	7.92e-11	2.2e-10	6652.27	7446.25	10635.7	10879.5
HP0850	0.609688	9.46e-08	2.21e-07	1051.26	1221.66	1729.59	1737.71
oorB	0.608203	1.46e-11	4.16e-11	8357.91	9138.34	13379.6	13290
HP0032	0.605512	2.48e-08	5.93e-08	1731.73	2007.69	2750.98	2937.43
HP0117	0.601784	1.97e-05	3.85e-05	397.571	372.646	569.946	599.163
HP0478	0.596048	5.08e-05	9.52e-05	327.532	337.826	514.927	490.73
HP0941	0.594353	4.63e-06	9.51e-06	496.449	544.522	780.149	791.006
HP1367	0.586641	0.000734603	0.00121316	230.028	205.214	324.474	329.47
frdB	0.585632	1.22e-11	3.49e-11	8069.52	8060.41	11837.7	12368.3
HP0778	0.582654	8.96e-05	0.000163107	324.099	316.341	475.426	483.779
HP0384	0.581531	0.00234339	0.00367751	163.423	176.321	242.65	265.522
HP0597	0.579102	3.15e-08	7.53e-08	8458.85	10102.9	13333.1	14395.2
HP1220	0.577321	0.000250209	0.000435005	341.952	290.412	493.765	450.415
HP0873	0.574526	2.07e-06	4.4e-06	872.733	791.965	1314.83	1164.96
trpC	0.567883	7.17e-08	1.68e-07	1373.99	1274.26	1924.27	2001.84
HP0965	0.565908	0.000312897	0.000537068	370.791	483.773	595.34	668.671
flgK	0.565292	3.29e-06	6.84e-06	681.158	755.663	1034.09	1091.28
HP1563	0.563989	4.53e-08	1.07e-07	65292.3	76633.9	110792	99023.2
leuS	0.561555	2.67e-09	6.76e-09	8534.38	7583.31	11709.3	12079.2
HP0711	0.561413	2.92e-05	5.6e-05	436.023	463.77	661.646	665.891
HP1206	0.56078	2.58e-07	5.88e-07	1008.69	1076.45	1537.73	1537.53
HP0964	0.560265	0.00139003	0.00223339	202.562	225.958	314.599	316.959
HP0881	0.55499	0.433337	0.487957	8.92646	11.1127	14.1076	15.2919
glmU	0.554002	1.07e-06	2.33e-06	1091.09	1260.92	1742.29	1709.91
HP1394	0.55304	2.28e-06	4.8e-06	771.109	725.289	1101.8	1094.06
tRNA-Tyr-1	0.552239	0.00578787	0.00864393	161.363	145.947	217.257	233.548
HP1105	0.551103	1.99e-08	4.79e-08	2423.88	2233.65	3476.11	3348.92
HP0878	0.545453	0.000158091	0.000280441	353.625	365.237	537.499	511.582
HP1152	0.543503	2.04e-07	4.69e-07	1680.92	1538	2420.86	2271.54
HP0167	0.542053	1.7e-05	3.33e-05	860.374	799.373	1319.06	1098.23
HP0486	0.541093	2.2e-10	5.88e-10	44311.6	47340.8	66874.2	66486.2
HP0528	0.539297	3.53e-06	7.31e-06	918.739	837.897	1319.06	1234.47
HP0665	0.535167	2.04e-08	4.9e-08	2395.72	2285.51	3435.2	3348.92
HP0388	0.531032	9e-09	2.2e-08	3055.6	2930.79	4347.96	4302.57
HP0014	0.530304	6.57e-08	1.54e-07	2121.06	2301.07	3202.42	3183.49
fliI	0.528466	6.03e-07	1.34e-06	1461.88	1326.86	2000.46	2022.7
HP1413	0.5222	0.000307823	0.000529584	481.342	614.162	761.809	810.469
HP0341	0.521959	0.191025	0.228276	32.9592	33.3381	43.7335	51.4363
ispH	0.519734	4.17e-06	8.6e-06	1573.8	1782.48	2566.17	2245.12
HP1423	0.519225	3.29e-06	6.84e-06	896.079	879.385	1288.02	1256.71
HP0927	0.516252	2.64e-05	5.08e-05	711.37	642.314	960.726	975.899
HP0480	0.515913	1.68e-09	4.31e-09	7535.31	7602.57	10902.3	10743.2
HP1263	0.509484	6.42e-09	1.59e-08	6797.16	6585.38	9330.75	9720.06
HP0634	0.504068	6.76e-07	1.5e-06	1641.1	1540.22	2272.73	2239.56
HP0334	0.503804	3.25e-05	6.18e-05	676.351	682.32	924.047	1002.31
HP1457	0.502831	2.12e-06	4.49e-06	4366.41	5255.57	6926.82	6706.18
HP1097	0.502356	2.44e-05	4.71e-05	696.264	742.328	1007.28	1030.12
HP0745	0.501858	0.0004099	0.000698057	442.89	390.426	589.697	590.822
HP0219	0.501502	0.00561285	0.00839945	192.262	198.547	279.33	273.863
tuf	0.500353	1.66e-09	4.26e-09	42820.9	43149.1	61857.5	59752.3
HP0302	0.500346	1.42e-05	2.8e-05	966.118	1056.45	1501.05	1359.59
HP1043	0.496985	1.49e-06	3.21e-06	1823.06	1890.64	2762.26	2478.67
HP0061	0.495162	0.0289824	0.039834	109.864	123.721	159.416	169.601
HP1192	0.493126	1.2e-08	2.91e-08	16347.8	16030.4	23523	22049.5
HP0025	0.492125	2.15e-06	4.55e-06	34578.4	41736.3	55353.9	51982.6
HP0511	0.490542	0.0104684	0.0152501	219.042	173.358	283.562	268.303
HP1383	0.48972	0.000753708	0.00124332	451.13	390.426	619.323	563.019
HP1011	0.489402	0.000111149	0.000200041	835.654	700.841	1072.18	1085.72
HP0985	0.483847	0.0024755	0.00386438	339.206	295.598	475.426	412.88
HP0979	0.479689	5.55e-08	1.31e-07	4893.76	5019.24	6984.66	6838.24
flgD	0.478703	4.21e-05	7.94e-05	1381.54	1669.87	2188.09	2063.01
HP0652	0.476924	7.55e-05	0.000138654	672.231	690.469	973.423	923.073
HP0170	0.475697	9.19e-07	2.02e-06	3247.86	3607.18	4709.11	4822.5
HP0215	0.474357	2.38e-06	4.99e-06	1966.57	2164.75	2876.54	2862.36
tsf	0.474036	4.42e-08	1.05e-07	25843.5	25464.4	34319.5	36946.5
HP1377	0.473704	1.17e-07	2.71e-07	4301.87	4296.17	6081.78	5858.17
HP0186	0.473536	9.46e-05	0.000171475	1130.91	1392.05	1725.36	1776.64
HP1165	0.470272	2.68e-05	5.16e-05	991.524	1026.81	1458.72	1337.34
motB	0.465156	3.22e-05	6.14e-05	1130.23	1169.8	1492.58	1682.11
HP1036	0.464168	2.99e-06	6.24e-06	2240.54	2370.71	3308.23	3052.81
HP0963	0.46213	0.00486967	0.0073616	268.48	305.97	371.029	419.831
HP0339	0.459314	0.00282297	0.00437457	383.151	462.288	531.856	629.747
HP1251	0.457503	8.76e-06	1.76e-05	1398.02	1346.12	1883.36	1885.07
ruvA	0.457383	0.00285857	0.0044159	304.186	325.232	427.46	436.513
HP0267	0.452751	3.15e-06	6.56e-06	2128.62	2097.34	2813.05	2970.79
HP1132	0.451459	2.77e-07	6.3e-07	12538.9	11878	16259	17129.7
HP1095	0.450744	4.88e-05	9.18e-05	2263.89	1893.6	2885	2798.41
HP0104	0.450633	7.98e-07	1.76e-06	3243.74	3255.28	4376.17	4505.54
HP1080	0.450427	0.0375508	0.0506713	126.344	139.279	190.452	172.381
secD	0.450286	2.52e-07	5.76e-07	7588.87	7335.12	10005.1	10386
HP0602	0.449992	0.000532598	0.000892477	620.732	737.142	925.457	928.633
HP0742	0.439873	1.24e-05	2.47e-05	2248.78	2460.35	3089.56	3297.48
HP0833	0.43633	0.000909381	0.00149018	623.479	546.745	814.007	770.154
HP0447	0.436119	0.321291	0.370927	25.4061	32.5972	33.8582	44.4854
HP0986	0.433673	0.006633	0.00983674	286.333	275.595	387.958	371.175
HP0224	0.431083	2.8e-06	5.84e-06	17089.4	18546.4	25019.8	23025.4
recA	0.430368	2.17e-06	4.59e-06	5515.87	5120.73	7163.83	7170.49
HP0138	0.429752	1.05e-06	2.29e-06	8121.71	7737.4	10470.6	10892
HP0464	0.428925	7.57e-05	0.00013886	1058.82	1050.52	1396.65	1443
HP0474	0.427985	0.0100936	0.0147331	252.001	254.851	328.707	353.103
groES	0.427844	4.22e-06	8.69e-06	12582.2	14007.9	18366.7	17402.1
HP1221	0.42576	0.000149358	0.000265903	917.366	933.467	1275.33	1210.84
tRNA-Ser-3	0.425271	9.75e-06	1.95e-05	152050	177291	220909	221336
HP1142	0.424455	0.0114308	0.0166357	337.146	274.113	437.335	383.687
uvrA	0.416659	5.69e-06	1.16e-05	2980.06	2992.28	3958.59	4013.42
HP0900	0.416107	0.000259585	0.000450251	9597.32	12287.7	14358.7	14841.4
HP0805	0.415855	0.000114523	0.000205614	1158.38	1243.88	1623.78	1580.62
HP0993	0.414594	0.280691	0.327077	43.259	33.3381	52.1981	50.0461
HP1193	0.413378	6.58e-05	0.000122136	3009.59	3499.76	4412.85	4255.31
HP0890	0.409277	0.000232736	0.000407013	1216.06	1380.94	1749.34	1698.79
HP0028	0.408172	6.8e-06	1.38e-05	6179.86	5760.82	8063.89	7782.17
HP0121	0.407621	5.07e-06	1.04e-05	4600.56	4782.16	6160.78	6284.96
HP1434	0.40722	0.000432144	0.0007341	794.455	819.376	1084.87	1055.14
HP1008	0.40638	0.0350541	0.0476491	176.469	171.136	234.186	226.598
HP0513	0.406234	0.0120908	0.017579	274.66	277.077	379.494	351.713
HP0823	0.406065	0.0404816	0.0543297	199.129	169.654	268.044	221.037
fbcH	0.401693	5.12e-06	1.05e-05	6605.58	6277.93	8512.51	8507.84
HP0750	0.398217	0.000105893	0.000191045	1633.54	1731.36	2145.76	2288.22
HP0536	0.396591	0.00182819	0.00290279	2554.34	1921.76	3003.5	2890.16
HP1404	0.393375	0.0787031	0.101053	181.276	127.426	193.274	212.696
HP0485	0.391969	2.64e-05	5.09e-05	2651.85	2620.37	3481.75	3436.5
HP0640	0.391968	0.0275881	0.0380234	213.548	248.924	313.188	293.326
HP0864	0.39165	3.13e-05	5.98e-05	2428.68	2421.83	3182.67	3180.71
HP1264	0.388758	0.00166417	0.0026556	817.801	716.399	986.12	1023.16
ruvB	0.388326	3.25e-05	6.19e-05	2664.21	2750.76	3533.95	3553.27
HP0338	0.385973	0.00133015	0.00214181	1338.97	1646.9	1890.42	2010.18
HP0391	0.385622	0.000253813	0.000440755	1332.1	1259.44	1684.45	1701.57
HP1222	0.384339	7.11e-05	0.000131592	2682.74	2916.71	3614.36	3693.68
HP1083	0.380173	3.98e-05	7.51e-05	3866.53	4098.36	5293.16	5072.73
HP0340	0.378832	0.107724	0.135156	106.431	113.35	143.897	141.797
HP0670	0.37559	0.0574513	0.0753318	170.976	182.248	249.704	208.525
hypA	0.375399	0.00536756	0.00804863	489.582	475.623	647.538	604.724
HP0315	0.370601	0.0799295	0.102539	141.45	155.578	207.381	176.552
HP0263	0.370167	0.0299483	0.0411235	315.859	291.153	442.978	341.982
guaA	0.36977	8.78e-05	0.000159916	2844.11	2706.31	3555.11	3617.22
adk	0.369753	0.000308712	0.000530498	1501.71	1496.51	1987.76	1886.46
HP1088	0.367463	5.7e-05	0.000106193	4805.87	5166.66	6387.91	6476.8
HP1262	0.367279	0.000169204	0.000299439	3972.96	4439.89	5283.29	5567.63
HP0209	0.364409	0.0132822	0.0191423	365.985	365.978	455.675	486.559
HP1122	0.363931	0.00122984	0.00198676	945.518	1006.07	1279.56	1231.69
fliR	0.362717	0.0194421	0.0274075	310.366	308.192	395.012	400.369
HP1469	0.362052	9.21e-05	0.00016712	4732.4	5159.26	6342.77	6369.76
HP1096	0.361547	0.0173587	0.0246108	342.639	382.277	442.978	487.949
HP0033	0.360694	4.5e-05	8.48e-05	4698.75	4636.96	6012.65	5974.95
HP0018	0.356064	0.000498131	0.000840419	1517.5	1577.26	2020.21	1940.68
HP0782	0.353369	0.00210637	0.00332667	2378.56	2960.42	3385.82	3433.72
HP0385	0.352002	0.0495599	0.0655641	210.115	217.809	266.633	279.424
HP1366	0.348445	0.0145256	0.0207929	502.628	429.691	599.572	588.042
HP0858	0.34841	0.000261863	0.000453671	3178.51	3407.15	4081.32	4302.57
HP1435	0.347937	0.00176016	0.00279776	1270.99	1452.8	1726.77	1739.1
HP1361	0.344391	0.00494965	0.00747488	663.991	691.951	881.724	839.662
glmM	0.344215	0.000631504	0.00105109	1718.69	1826.93	2229	2271.54
HP0997	0.343994	0.00115336	0.00186932	2710.21	2324.78	3222.17	3169.59
ksgA	0.342847	0.000218241	0.000382115	3970.22	3742.02	4984.21	4797.47
HP1139	0.3413	0.000235996	0.000412229	4880.71	5331.87	6524.76	6412.85
HP1499	0.340425	0.0411671	0.0551001	306.246	260.778	355.511	362.834
HP1234	0.340107	0.00449629	0.006818	1200.27	1460.95	1666.11	1701.57
HP0995	0.338975	0.279913	0.326602	68.6651	54.0818	77.5917	77.8495
HP0949	0.337217	0.0151787	0.0216651	530.094	511.184	713.844	601.943
HP0872	0.334534	0.00451739	0.00684299	760.122	790.483	987.531	967.558
lpxK	0.332375	0.0162665	0.0231509	632.405	534.15	771.685	697.865
aroB	0.330927	0.00615913	0.00916148	727.163	723.807	945.208	879.977
HP1094	0.329909	0.0130178	0.0188161	543.141	519.333	639.073	696.475
HP0416	0.32968	0.00302695	0.00467114	1932.24	2312.92	2660.69	2673.3
prfB	0.328908	0.00169015	0.00268937	1395.96	1343.9	1683.03	1758.56
trpD	0.326786	0.00242597	0.00379906	1188.59	1133.5	1447.44	1465.24
HP1091	0.326371	0.00581438	0.00867477	892.646	999.402	1145.54	1226.13
HP1380	0.326349	0.000665036	0.00110319	2613.39	2489.99	3260.26	3139
HP0063	0.326226	0.0126323	0.0182946	598.76	663.058	833.758	747.911
HP0976	0.321856	0.0129769	0.0187753	620.046	719.362	842.223	831.321
HP0316	0.319793	0.0510389	0.0674004	281.527	283.003	372.44	332.25
HP0563	0.319652	0.00157406	0.00252088	1536.04	1556.52	1932.74	1926.77
HP1438	0.318547	0.0959543	0.121728	184.709	185.952	241.24	221.037
infB	0.318547	0.000238862	0.000416744	7541.49	7515.15	9215.07	9561.59
HP1322	0.318238	0.00958362	0.0140579	1101.39	1357.97	1525.03	1540.31
HP0699	0.317866	0.00142472	0.00228664	2652.53	2396.64	3124.83	3169.59
dnaA	0.314723	0.00272618	0.00423343	1774.99	1598.75	2089.33	2107.5
HP1115	0.309332	0.473094	0.527518	25.4061	45.9325	38.0905	50.0461
HP0405	0.307939	0.00528665	0.00793575	1197.52	1309.08	1601.21	1501.38
HP0989	0.305307	0.00378753	0.00578467	2926.51	2510.73	3404.16	3315.55
HP0322	0.305074	0.00250391	0.00390052	1737.91	1652.09	2100.62	2088.03
HP1501	0.304767	0.00342926	0.00525371	4413.79	3742.02	5101.3	4974.03
HP1057	0.303612	0.0366155	0.0494543	538.334	449.694	639.073	581.091
HP0587	0.303195	0.0583622	0.0763911	300.753	296.339	385.137	351.713
HP0773	0.300934	0.00316928	0.00487563	1677.49	1590.6	2039.96	1986.55
HP1436	0.296966	0.103338	0.130315	223.162	202.992	263.812	259.962
tRNA-Ser-1	0.2966	0.00658999	0.00978274	5388.84	6613.54	7186.4	7554.18
HP1120	0.296167	0.0731012	0.0941869	271.227	297.079	365.386	332.25
HP1363	0.291144	0.00680721	0.0100791	1211.94	1209.06	1526.44	1436.05
HP1171	0.290329	0.0253462	0.0351294	764.929	938.653	1049.6	1032.9
HP0420	0.289015	0.0477428	0.0633864	424.35	382.277	495.176	490.73
HP1539	0.288105	0.000843019	0.00138296	7286.05	7142.5	8786.2	8831.75
HP0106	0.28575	0.00318688	0.00489755	2636.05	2855.22	3320.92	3372.55
HP0796	0.282462	0.00219925	0.00346967	3254.73	3217.5	3866.89	4005.08
HP1562	0.282403	0.00285408	0.00441356	6626.18	7452.18	8583.05	8538.42
HP1492	0.282355	0.0271521	0.0374573	691.457	766.035	939.565	832.711
HP0836	0.281701	0.00244925	0.00382743	4810.68	5240.75	6189	6029.16
HP0348	0.281405	0.0139768	0.020046	977.104	907.537	1138.48	1152.45
HP0909	0.280801	0.0927759	0.1181	273.974	308.192	330.117	376.736
HP1371	0.279904	0.0473466	0.0630296	442.89	424.505	543.142	510.192
HP1505	0.278348	0.0163292	0.0232178	1060.19	961.619	1266.86	1185.81
HP1473	0.27501	0.0445723	0.0594966	523.228	488.959	582.643	642.258
HP0214	0.272728	0.00588395	0.00876975	1997.47	2111.41	2522.44	2441.14
fusA	0.267739	0.00114173	0.00185453	38392	38372.1	45965.3	46452.5
HP1098	0.266299	0.00374975	0.00573286	3176.45	3153.78	3779.42	3834.09
HP1157	0.262539	0.0027961	0.00433747	6023.3	6238.67	7306.32	7402.65
HP0329	0.26083	0.0484882	0.0643184	620.732	551.19	706.79	697.865
HP1521	0.259959	0.0982401	0.124521	322.726	307.451	371.029	383.687
HP1140	0.259557	0.105297	0.13256	305.56	337.085	406.298	362.834
HP1154	0.258948	0.0251231	0.0348528	868.613	860.123	1059.48	1009.26
mnmA	0.255561	0.0051892	0.00780485	4943.2	5316.31	6081.78	6165.4
HP0441	0.254275	0.32203	0.371361	89.9513	107.423	112.861	122.335
dut	0.253333	0.0187606	0.0265477	1137.78	1137.94	1357.15	1355.42
flhF	0.251605	0.00499774	0.00753983	4742.01	4934.78	5700.87	5819.25
HP1285	0.248177	0.0195212	0.0274928	2872.26	3394.56	3755.44	3686.73
HP0709	0.245413	0.0197041	0.027724	1450.21	1521.7	1818.47	1704.35
HP0089	0.244421	0.0160697	0.0228928	1652.08	1649.12	1907.35	2003.23
folE	0.243586	0.166623	0.202875	288.393	243.739	335.76	294.716
HP1125	0.243266	0.0151166	0.0215972	10654.8	12464	13316.1	14047.7
pyrH	0.242826	0.0181013	0.0256392	1846.4	1999.54	2210.66	2339.66
HP1337	0.238689	0.0594511	0.0776109	701.071	634.905	782.971	793.787
HP1433	0.237572	0.021138	0.0296318	1769.5	1636.53	2001.87	2014.36
HP0948	0.23718	0.0358539	0.0485584	1356.82	1544.67	1780.38	1639.01
flgH	0.236882	0.0197996	0.027832	1615.69	1696.54	1956.72	1946.24
HP1113	0.235372	0.0396648	0.0533299	1021.05	951.247	1189.27	1132.99
HP0360	0.234383	0.0329812	0.0450793	1150.14	1186.1	1424.87	1323.44
HP1512	0.23404	0.00681003	0.0100791	14171.8	13359.7	16077	16303.9
HP1385	0.23193	0.0379758	0.0511518	1047.83	1076.45	1290.84	1203.89
HP0221	0.230636	0.0366005	0.0494543	6449.71	8021.89	8642.3	8336.85
oorC	0.2306	0.0104372	0.0152196	4684.33	4802.17	5683.94	5446.68
HP0195	0.229201	0.0355634	0.048253	1471.49	1641.72	1763.45	1885.07
HP0290	0.22732	0.0345645	0.0470268	2335.3	2749.28	2954.13	2997.21
HP0946	0.225517	0.0125966	0.0182607	6529.36	7021	7811.37	8031.01
HP0082	0.223543	0.0150138	0.0214711	3320.64	3427.16	3930.37	3948.08
HP0230	0.223393	0.148772	0.182489	346.072	371.164	392.191	444.854
HP1359	0.219974	0.0628695	0.0817903	877.54	820.117	1011.51	966.168
HP0897	0.219558	0.0954109	0.121142	602.879	622.311	665.878	760.423
HP0680	0.218827	0.0139511	0.020046	9155.8	9580.63	10563.8	11240.9
HP1164	0.208133	0.0244492	0.0339496	4456.36	4815.5	5356.65	5353.54
HP0166	0.207927	0.0232084	0.0323478	7785.25	8399.72	9622.78	9070.86
HP0437	0.20531	0.392708	0.445249	113.984	111.868	124.147	136.237
HP0144	0.204284	0.0316187	0.043257	3628.26	3454.57	4222.4	3938.35
HP0408	0.200751	0.172443	0.209451	563.74	486.736	658.824	549.117
HP0234	0.200497	0.0528684	0.0696923	1590.28	1635.05	1790.25	1915.65
gyrB	0.199644	0.0223654	0.0312315	6674.25	6646.13	7513.7	7783.56
HP0820	0.198153	0.189568	0.2269	357.058	374.128	406.298	432.343
HP0898	0.195885	0.0644764	0.0838023	9178.46	11053.4	11159.1	12013.8
HP1218	0.193881	0.0564781	0.074187	2749.35	2443.31	2959.77	2980.52
HP0155	0.192231	0.117572	0.146767	992.21	860.864	1094.75	1023.16
HP0515	0.192104	0.0579839	0.075963	2047.59	2236.62	2406.75	2487.01
HP0540	0.190177	0.133837	0.1654	799.262	714.176	904.296	822.98
HP0102	0.189577	0.278994	0.325786	569.234	388.204	579.822	512.973
HP1226	0.185689	0.189997	0.227231	442.89	427.468	490.944	499.071
HP1358	0.185306	0.150906	0.1848	579.533	590.455	656.003	674.232
HP0030	0.184293	0.0742937	0.0956402	1494.84	1475.03	1661.87	1712.69
HP0803	0.182481	0.148109	0.181826	674.291	686.024	809.775	734.009
HP0013	0.181909	0.133572	0.16521	1906.14	2411.46	2523.85	2373.02
HP0066	0.181678	0.0921553	0.117411	1246.96	1291.3	1398.06	1480.53
HP1261	0.18134	0.070874	0.0914761	5636.72	6567.6	6870.39	6967.53
HP1030	0.180845	0.0941269	0.119717	1321.12	1260.18	1420.63	1505.55
dnaG	0.179717	0.116292	0.145292	1132.97	1202.39	1399.47	1245.59
rpsB	0.177468	0.0594234	0.0776109	12351.5	10911.9	13079.1	13230.2
HP0955	0.173418	0.0984366	0.124664	1451.58	1388.35	1620.96	1582.01
HP1023	0.173174	0.175616	0.21295	732.656	839.379	926.868	845.223
HP0081	0.172593	0.618368	0.65926	66.6051	48.8959	77.5917	52.8264
HP0639	0.172173	0.182971	0.219892	729.223	846.788	845.044	930.023
gmk	0.172004	0.181403	0.218717	714.804	638.61	781.56	743.741
HP0393	0.171792	0.120453	0.150111	1653.46	1878.79	2076.64	1901.75
HP0660	0.171612	0.178284	0.215657	699.697	643.796	732.183	781.275
ddl	0.165312	0.115515	0.144564	3832.89	4548.8	4720.4	4677.92
HP0145	0.164146	0.136171	0.168145	1198.89	1121.64	1300.72	1299.81
HP0152	0.161419	0.151361	0.185205	989.464	1029.04	1114.5	1142.72
HP0546	0.161101	0.254155	0.298426	1376.73	1032	1444.62	1249.76
HP1352	0.159681	0.188644	0.225976	725.103	751.959	835.169	814.639
HP0440	0.156213	0.45997	0.514044	154.496	158.541	184.809	164.04
HP0586	0.155721	0.163945	0.199778	1274.42	1152.76	1368.44	1335.95
mraY	0.154591	0.27172	0.317542	478.596	477.846	562.893	501.851
nusB	0.151762	0.173151	0.210134	1141.9	1094.97	1203.38	1281.74
HP0763	0.149512	0.24633	0.289926	723.73	807.523	794.257	903.61
HP0748	0.146009	0.320255	0.370344	444.263	402.28	482.479	454.585
yajC	0.145872	0.160399	0.195618	1671.31	1567.63	1819.88	1764.13
HP1267	0.145864	0.124661	0.155094	6325.43	6264.6	6560.03	7369.29
porA	0.14577	0.087629	0.112029	18079.5	18105.5	19486.8	20545.3
HP0650	0.144943	0.201423	0.239736	1450.21	1358.71	1446.03	1659.86
HP0422	0.144792	0.127879	0.158832	2715.7	2619.63	2980.93	2917.97
HP0947	0.144632	0.2219	0.263051	6621.37	8496.77	8773.51	7937.87
HP1351	0.14413	0.454968	0.509605	404.437	265.223	365.386	375.346
HP0451	0.141862	0.679894	0.716619	50.1255	57.786	53.6088	65.338
HP1384	0.139105	0.603906	0.647349	88.578	98.5326	112.861	93.1414
HP1284	0.137712	0.201362	0.239736	1391.15	1494.29	1536.32	1637.62
HP0664	0.136233	0.180528	0.217838	1696.71	1789.89	1922.86	1908.7
hslU	0.131996	0.155986	0.190707	3795.12	3574.58	4051.7	4024.54
HP1012	0.130536	0.141811	0.174672	7086.24	7527.74	8056.84	7940.65
HP0944a	0.129965	0.1991	0.237352	12365.2	10433.3	12629.1	12319.7
HP1535	0.128277	0.616464	0.658558	102.311	106.682	126.968	101.482
HP0994	0.126664	0.56896	0.61679	140.077	147.428	170.702	143.187
dapF	0.125178	0.368352	0.420853	491.642	557.857	579.822	564.409
oorA	0.119081	0.183545	0.220403	12835.6	14013.1	14722.7	14435.5
HP0978	0.115956	0.23079	0.272861	3421.58	3687.19	3725.81	3977.27
HP0913	0.114015	0.18452	0.221395	36821	34966.5	37925.4	39765.8
tRNA-Cys-1	0.112238	0.385067	0.437997	602.193	648.241	670.11	681.183
HP0047	0.107962	0.462747	0.516758	506.062	443.767	543.142	480.999
HP0323	0.107562	0.386389	0.438756	953.758	1128.31	1163.88	1078.77
engA	0.104323	0.3609	0.412655	1293.65	1434.28	1544.78	1387.39
HP0489	0.103978	0.786426	0.813298	37.0791	55.5635	45.1443	54.2166
HP0509	0.100865	0.321403	0.370927	1974.12	1837.3	2054.06	2033.82
HP1472	0.0994491	0.385802	0.438425	1152.89	1047.56	1152.59	1205.28
HP1260	0.0979765	0.285492	0.332327	3527.33	3461.24	3763.9	3715.92
HP0892	0.0960701	0.370583	0.423075	1297.08	1258.7	1347.27	1384.61
HP1368	0.0959867	0.505066	0.559382	477.222	457.843	466.961	532.435
HP0973	0.0951172	0.31143	0.361103	3453.17	3684.97	3845.73	3778.48
HP0226	0.0903553	0.456318	0.510346	1805.89	2286.99	2165.51	2190.91
HP1548	0.0896038	0.451982	0.50741	1330.73	1139.42	1361.38	1267.83
HP0599	0.0895636	0.403111	0.456695	4467.35	5401.51	5238.15	5261.79
HP0512	0.0888721	0.34224	0.392227	10338.9	11593.5	11487.8	11837.3
mod	0.0876497	0.503751	0.558343	1026.54	846.047	1046.78	943.925
HP0800	0.0869262	0.532627	0.5851	469.669	483.773	513.516	499.071
HP0675	0.0862178	0.534358	0.586568	476.536	485.254	517.748	503.241
fmt	0.0840446	0.559002	0.608217	444.95	463.029	505.051	457.366
HP0638	0.0798645	0.437332	0.492082	1645.22	1740.25	1776.14	1801.66
HP0216	0.0783141	0.454287	0.509227	2505.59	2878.19	2883.59	2799.8
fliL	0.0781991	0.4881	0.541806	1146.02	1060.89	1162.46	1167.74
HP0966	0.0775973	0.57722	0.624545	484.089	511.184	506.462	543.556
HP0910	0.0760453	0.52778	0.581931	771.796	783.816	809.775	829.931
ackA	0.0757414	0.693383	0.728697	260.927	386.722	332.939	348.933
HP1170	0.0750955	0.616816	0.658558	395.511	455.621	444.389	451.805
lspA	0.0748556	0.712441	0.744574	216.982	174.84	197.506	215.476
HP0701	0.0744647	0.453921	0.509202	3715.47	3394.56	3590.38	3896.64
HP0358	0.0718916	0.519798	0.574411	1091.09	1166.09	1179.39	1192.77
HP0577	0.0693567	0.532321	0.5851	1092.46	1112.75	1180.8	1132.99
HP0806	0.0683228	0.672332	0.709658	328.219	393.39	373.851	382.297
HP0545	0.0679765	0.550118	0.600754	3390	2743.35	3189.72	3240.48
carB	0.0673851	0.495938	0.550094	7887.56	9106.49	8693.09	9112.56
HP0241	0.0669145	0.526054	0.58046	2180.12	2092.89	2379.95	2096.38
HP1534	0.0660354	0.540627	0.592134	3273.26	2780.4	3263.08	3075.05
HP0146	0.0649965	0.643609	0.682741	501.255	468.956	493.765	521.314
dcd	0.0639048	0.585673	0.633056	929.039	1016.44	1001.64	1031.51
HP0431	0.0638449	0.692244	0.728084	320.666	308.933	328.707	329.47
HP0766	0.0617926	0.686373	0.722421	392.764	470.438	454.264	446.244
HP0825	0.0603655	0.485353	0.539442	30766.8	32894.3	33741.1	32639.8
HP1281	0.0603398	0.69381	0.728697	438.77	383.018	448.621	408.71
HP0212	0.0593296	0.604134	0.647349	1724.18	1470.58	1625.19	1704.35
HP1336	0.0588382	0.588618	0.635313	1178.98	1192.76	1245.7	1224.74
HP0902	0.0581947	0.623502	0.662834	852.82	914.945	929.69	910.561
HP0471	0.057399	0.572828	0.620529	1826.49	1861.75	1979.29	1858.66
HP1242	0.0541831	0.589354	0.635645	1845.72	1870.64	1963.78	1894.8
HP0103	0.053603	0.549346	0.600354	7220.82	7570.71	7478.43	7872.53
HP0813	0.053567	0.621302	0.660969	1327.3	1327.6	1324.7	1430.48
HP1509	0.0527451	0.67904	0.716228	1678.86	2195.13	1975.06	2042.16
HP0974	0.0516248	0.610621	0.653828	2531	2307.74	2566.17	2449.48
HP1002	0.0476717	0.744904	0.775222	534.901	454.88	495.176	528.264
HP0289	0.0466101	0.592172	0.638009	7199.53	7099.53	7297.85	7470.77
pcm	0.0442319	0.697682	0.731727	1231.85	1400.94	1374.08	1340.12
atpC	0.0438071	0.759721	0.788679	687.337	561.562	613.68	674.232
HP1010	0.0429003	0.649869	0.688889	2900.41	2979.68	2976.7	3080.62
HP0797	0.0426114	0.618807	0.65926	8933.33	9070.93	9264.45	9279.38
HP0781	0.0423235	0.680891	0.71716	1623.93	1613.56	1633.66	1700.18
HP1421	0.0420312	0.706807	0.740251	1749.59	1512.81	1680.21	1679.32
HP1532	0.0410762	0.666988	0.705523	3258.16	3127.85	3186.9	3383.67
HP0428	0.0402938	0.759961	0.788679	677.724	688.987	647.538	757.642
lpxD	0.0354627	0.72868	0.760473	3647.49	4220.6	4005.14	4057.9
HP0998	0.0346885	0.898981	0.916912	100.251	97.7917	83.2347	119.555
HP0918	0.0346424	0.80079	0.826424	528.034	523.038	514.927	561.628
ribC	0.0340587	0.850308	0.873274	245.821	251.888	235.597	273.863
HP0271	0.0334677	0.777783	0.804921	1251.08	1077.19	1199.14	1184.42
HP0814	0.0299546	0.803343	0.828482	1007.32	917.168	1025.62	939.755
HP0708	0.0270335	0.863624	0.885722	336.459	367.46	359.743	357.274
coaE	0.0223139	0.892535	0.911545	311.053	324.491	300.491	344.762
metN	0.0202563	0.84321	0.866584	2071.63	1906.2	2018.79	2015.75
HP1129	0.0182459	0.888631	0.908229	1413.81	1104.6	1261.22	1290.08
HP1416	0.0138562	0.900836	0.917541	1148.77	1127.57	1179.39	1119.09
HP0868	0.0127087	0.918824	0.931488	763.556	737.883	725.13	789.616
ndk	0.0125997	0.913184	0.926935	2325.69	1950.65	2264.27	2050.5
HP1212	0.0111816	0.901696	0.917787	10187.2	11167.5	10789.5	10730.7
HP0373	0.00962209	0.933471	0.942739	953.758	949.024	940.976	974.509
HP1253	0.00938037	0.937843	0.944877	1014.18	912.723	1001.64	938.364
HP0286	0.00917924	0.945229	0.951646	874.107	720.103	818.24	786.836
HP0048	0.00876569	0.933839	0.942739	1750.27	1617.27	1657.64	1730.76
HP0749	0.00637626	0.968285	0.972878	346.072	321.527	330.117	340.592
HP0754	0.00289566	0.990626	0.991295	122.224	111.127	122.736	111.214
HP1163	0.00231749	0.992285	0.992285	143.51	116.313	129.79	130.676
HP0911	0.00146056	0.990437	0.991295	760.809	771.221	775.917	757.642
HP0854	-0.00249196	0.980903	0.982891	2772.7	3064.14	3064.17	2762.27
HP1252	-0.00393806	0.971332	0.974618	2048.28	1799.52	1986.35	1851.71
HP1269	-0.00489319	0.959041	0.964242	3174.39	3084.14	3027.49	3209.9
HP0463	-0.00578686	0.97102	0.974618	359.805	350.42	378.083	329.47
HP0988	-0.00819545	0.974676	0.977312	118.791	99.2734	101.575	115.384
HP1138	-0.00831245	0.931674	0.941835	2437.61	2377.38	2358.79	2428.63
HP0324	-0.00840459	0.929776	0.940558	2773.38	2906.34	2828.57	2817.87
HP0088	-0.010148	0.905722	0.920621	12641.9	12807	12372.3	12898
HP1271	-0.0110253	0.900805	0.917541	8587.26	8125.6	8180.99	8404.96
HP0848	-0.0111675	0.951567	0.957377	244.448	226.699	225.721	241.889
HP0857	-0.0117717	0.9219	0.933227	1005.26	953.47	1029.85	913.341
HP1392	-0.013942	0.935677	0.943952	299.38	268.927	292.027	271.083
HP0531	-0.0141421	0.91912	0.931488	679.098	643.796	723.719	586.651
HP0951	-0.0143147	0.919554	0.931488	519.108	554.153	492.355	569.969
HP0585	-0.0148709	0.911049	0.925401	580.907	619.348	612.269	575.53
HP1568	-0.0159776	0.903851	0.919349	658.498	597.122	619.323	622.796
HP0414	-0.0163121	0.937868	0.944877	190.889	164.468	183.399	168.211
HP0940	-0.0174041	0.873567	0.894065	1255.88	1345.38	1286.61	1283.13
HP0764	-0.0174807	0.893105	0.911545	607.686	634.165	613.68	613.065
HP0826	-0.021738	0.826642	0.851918	2071.63	2035.85	2056.89	1989.33
HP0287	-0.0230621	0.882151	0.902228	401.004	358.57	373.851	373.956
HP1333	-0.0257061	0.862684	0.88537	405.124	427.468	400.655	417.051
HP1565	-0.0286653	0.79735	0.823447	1360.26	1531.33	1398.06	1436.05
HP1508	-0.0307138	0.744609	0.775222	2921.01	2950.79	2832.8	2915.19
HP1406	-0.0325752	0.749369	0.778776	1814.13	1832.11	1733.82	1830.85
HP1278	-0.0352516	0.760505	0.788691	1421.37	1259.44	1364.2	1252.54
HP0585a	-0.0371269	0.865484	0.887017	219.728	166.69	211.614	165.43
HP0804	-0.038136	0.74385	0.775214	1025.86	1141.64	1065.12	1045.41
HP0484	-0.0394637	0.873004	0.894065	114.671	117.054	111.45	113.994
HP1465	-0.0427897	0.701947	0.735681	1476.3	1317.23	1344.45	1367.93
omp16	-0.0433546	0.662917	0.701718	5129.28	5825.28	5156.32	5473.1
HP0027	-0.0450406	0.618501	0.65926	16524.3	18194.5	17087.1	16563.9
HP0894	-0.0451403	0.829887	0.854075	166.856	175.581	158.005	173.771
rpsN	-0.045528	0.696889	0.731413	1722.12	1449.1	1502.46	1570.89
HP1133	-0.0463222	0.672029	0.709658	4792.82	3938.34	4173.02	4283.11
trmB	-0.0466532	0.732074	0.763478	550.694	534.15	537.499	512.973
HP1054	-0.0472553	0.710657	0.743233	763.556	734.92	682.807	767.374
HP0375	-0.0483329	0.722469	0.754523	693.517	609.717	661.646	599.163
HP1177	-0.049972	0.543179	0.594052	49885.9	49838.2	47910.8	48418.2
HP1089	-0.0502704	0.631884	0.671263	2013.95	1822.48	1863.61	1841.97
HP1575	-0.0531445	0.747932	0.777828	408.557	331.899	349.868	364.224
HP0021	-0.0544311	0.668714	0.706845	678.411	665.28	651.77	642.258
murE	-0.0548698	0.61933	0.659344	1260	1329.08	1206.2	1285.91
HP0275	-0.0550558	0.568898	0.61679	2868.14	2724.83	2643.76	2740.02
HP0819a	-0.0559605	0.829352	0.854075	171.663	107.423	134.022	134.846
HP0923	-0.0571155	0.657857	0.696858	715.49	778.63	756.166	679.793
HP0790	-0.0573901	0.60401	0.647349	1324.55	1250.55	1275.33	1199.72
HP1175	-0.059443	0.525791	0.58046	3981.2	4259.13	3900.75	4006.47
aroE	-0.0613809	0.709503	0.74255	597.386	434.877	482.479	507.412
HP0156	-0.0616197	0.513628	0.568017	3424.33	3329.36	3151.63	3319.72
HP0853	-0.0626925	0.552181	0.602121	1707.01	1775.07	1738.05	1595.91
HP0535	-0.0627762	0.593754	0.638997	1200.27	1084.6	1142.71	1045.41
mogA	-0.0631877	0.615427	0.658023	1431.67	1788.4	1467.19	1613.99
gatB	-0.0656669	0.536787	0.588798	2566.01	2249.95	2243.11	2359.12
HP1061	-0.0666884	0.556733	0.606639	1058.82	1123.86	1045.37	1038.46
HP0374	-0.068601	0.587747	0.634835	680.471	692.692	651.77	657.55
HP0326	-0.0701286	0.531196	0.584768	1090.4	1120.9	1059.48	1046.8
HP0270	-0.0713404	0.477039	0.531517	1899.96	1946.2	1818.47	1841.97
aspS	-0.0732321	0.451234	0.506954	3814.35	4199.86	3725.81	3891.08
HP0114	-0.0743665	0.564675	0.613489	790.335	736.401	678.575	771.544
HP0605	-0.0749996	0.389095	0.441491	7207.77	7142.5	6740.6	6882.73
HP0477	-0.0768956	0.560279	0.60916	646.825	653.427	651.77	581.091
HP0430	-0.0775314	0.775665	0.80329	101.624	90.3833	91.6993	90.361
HP1051	-0.0805944	0.405474	0.458672	3035.68	3287.88	2979.52	2999.99
HP0718	-0.0822471	0.596333	0.641307	409.244	500.071	430.281	428.172
flgL	-0.0827075	0.537324	0.588952	591.206	657.872	591.108	588.042
HP0727	-0.0832447	0.558621	0.608217	798.575	637.128	699.736	656.16
HP1266	-0.0841312	0.380642	0.433557	11771.3	10676.3	10089.7	11086.6
HP0404	-0.0856857	0.577378	0.624545	385.211	394.871	351.279	383.687
aroK	-0.0859664	0.481888	0.536114	909.812	829.007	830.937	807.688
nhaA	-0.0862312	0.412043	0.465746	1487.29	1478.73	1412.17	1381.83
HP0807	-0.0876088	0.794959	0.82155	1295.71	2064	1640.71	1520.85
HP1182	-0.0899987	0.357007	0.408835	3714.09	4082.06	3566.4	3757.63
HP0580	-0.090366	0.485607	0.539442	652.318	641.573	593.929	621.406
HP0223	-0.0906324	0.337551	0.387752	5528.91	6065.31	5319.97	5567.63
HP0901	-0.0938636	0.542541	0.593792	516.361	678.615	572.768	546.337
argS	-0.0967311	0.280761	0.327077	7349.91	7802.6	7208.97	6960.58
HP0572	-0.0971645	0.357674	0.409282	1627.36	1532.81	1462.96	1491.65
HP1169	-0.0991525	0.531536	0.584768	398.257	493.404	427.46	404.539
HP0147	-0.100324	0.287069	0.3339	2981.44	3065.62	2813.05	2827.6
HP0595	-0.100665	0.373899	0.426533	1062.25	1086.82	1017.16	987.02
HP0475	-0.101008	0.601914	0.646371	237.581	205.214	203.149	209.916
HP0135	-0.101264	0.565929	0.614401	273.974	260.778	255.347	243.28
HP0906	-0.101669	0.442821	0.497879	740.21	791.965	653.181	774.324
HP1570	-0.102599	0.477682	0.531833	653.692	546.004	586.875	531.045
HP0933	-0.103054	0.332684	0.382754	1542.9	1469.84	1427.69	1377.66
pyrE	-0.103134	0.289914	0.336945	3013.71	3159.71	2770.73	2976.35
HP0038	-0.104849	0.38513	0.437997	899.513	912.723	884.545	800.738
HP0238	-0.105562	0.327968	0.377621	2469.88	2135.12	2123.19	2157.54
HP0419	-0.10668	0.456104	0.510346	497.822	477.846	471.193	435.123
recR	-0.106751	0.528393	0.582174	325.473	292.634	294.848	279.424
ribH	-0.106821	0.403686	0.456998	668.798	680.838	617.912	635.307
moaA	-0.10709	0.55109	0.601373	259.554	254.851	249.704	227.988
HP0666	-0.1092	0.293144	0.340432	1799.71	1752.1	1591.34	1701.57
HP0045	-0.109205	0.252038	0.296175	3408.53	3263.43	3010.56	3175.15
HP0880	-0.10944	0.634171	0.673211	302.126	179.285	228.543	218.257
porC	-0.10947	0.235527	0.277913	3549.98	3545.69	3256.03	3321.11
tRNA-Pro-2	-0.112636	0.615146	0.658023	204.622	155.578	183.399	150.138
HP0677	-0.112693	0.419881	0.473884	592.58	526.001	516.337	518.533
HP0446	-0.11335	0.767911	0.795815	48.7522	45.1916	49.3765	37.5346
dapA	-0.115611	0.218668	0.259635	3295.24	3424.19	3057.11	3144.56
HP0136	-0.117865	0.235561	0.277913	2768.58	2561.11	2412.4	2499.52
HP1124	-0.119516	0.191728	0.228931	9000.62	9905.86	8710.02	8692.73
HP1130	-0.120353	0.268939	0.314788	2841.36	2413.68	2389.82	2445.31
HP1134	-0.124474	0.157033	0.191829	13544.2	13551.6	11970.3	12885.5
HP1187	-0.125098	0.379331	0.432397	484.775	495.626	435.924	462.926
HP1117	-0.127008	0.179629	0.217107	2945.05	2876.71	2666.33	2664.95
HP0415	-0.127252	0.266079	0.311933	1507.2	1698.76	1546.19	1388.78
HP0130	-0.128957	0.176225	0.21346	10899.2	12318.8	10861.4	10370.7
hemE	-0.130853	0.131638	0.162954	7373.94	7386.98	6702.51	6778.47
HP0220	-0.131153	0.308855	0.358398	8257.66	11449.8	9212.25	8781.7
HP0672	-0.133327	0.141985	0.174741	6166.12	6575.01	5895.56	5720.55
HP1375	-0.134868	0.17199	0.209239	2502.84	2524.06	2207.84	2370.24
HP1407	-0.136049	0.172447	0.209451	2115.57	2055.85	1876.31	1919.82
HP0009	-0.137214	0.15807	0.192937	3041.86	3242.69	2783.43	2930.48
ubiE	-0.13864	0.14225	0.174923	3640.62	3899.82	3412.62	3436.5
tRNA-Leu-1	-0.139095	0.230911	0.272861	1487.29	1315	1330.34	1215.01
ubiA	-0.139468	0.185739	0.222677	1615	1584.67	1495.4	1409.63
HP0065	-0.140284	0.592407	0.638009	102.311	117.054	107.218	91.7512
glyA	-0.144306	0.125006	0.155392	3405.79	3259.72	3003.5	3027.79
speE	-0.145294	0.270841	0.316764	745.016	719.362	610.858	713.157
HP0449	-0.146919	0.600394	0.645206	89.9513	100.755	76.1809	95.9217
HP1268	-0.147492	0.129197	0.1602	4226.34	3874.63	3549.47	3764.58
murD	-0.14859	0.320398	0.370344	579.533	566.748	451.443	582.481
HP1106	-0.152378	0.136651	0.168597	1898.59	2017.33	1739.46	1783.59
HP1158	-0.15263	0.176324	0.21346	1105.51	1152.02	1028.44	1002.31
HP0962	-0.153681	0.834294	0.858015	12.3597	12.5944	14.1076	8.34102
HP1085	-0.154987	0.505511	0.559457	149.003	136.316	136.844	119.555
rpsH	-0.155543	0.105805	0.133086	5881.85	5254.08	4972.92	5025.46
HP0496	-0.156715	0.243799	0.287404	593.266	634.165	567.125	533.825
HP1518	-0.162221	0.465362	0.519286	153.81	167.431	132.611	154.309
HP1265	-0.163541	0.106329	0.133519	2747.29	2486.28	2344.68	2328.53
tRNA-Thr-1	-0.163992	0.131191	0.162536	2291.35	2652.23	2140.12	2271.54
HP0839	-0.165461	0.0774574	0.0995401	4468.72	4446.56	3817.51	4131.58
moaC	-0.166882	0.334548	0.3846	374.225	431.914	306.135	411.49
HP0176	-0.17047	0.0491651	0.065158	9682.46	9566.55	8717.07	8386.89
HP0005	-0.171994	0.222663	0.263745	520.481	512.666	441.567	475.438
HP0179	-0.172496	0.318703	0.369247	302.813	368.201	284.973	310.008
minC	-0.173201	0.218635	0.259635	559.62	521.556	459.907	499.071
HP0921	-0.175499	0.196431	0.234359	617.299	689.728	603.805	553.287
HP1236	-0.177348	0.150797	0.1848	909.126	1014.22	885.956	814.639
HP0954	-0.177651	0.103072	0.130157	7465.95	9161.31	7554.61	7145.47
rpsS	-0.177654	0.0672219	0.0871417	2778.19	2669.27	2454.72	2361.9
HP1484	-0.178916	0.0691526	0.08941	4321.78	4878.47	4071.45	4055.12
flgC	-0.180755	0.085431	0.109408	3898.12	4592.51	3697.6	3792.38
HP0743	-0.182167	0.0623603	0.0812657	7585.43	8088.56	6476.79	7337.31
HP0305	-0.18351	0.0543811	0.0714957	3772.46	3587.18	3336.44	3144.56
HP1574	-0.183609	0.0945487	0.120151	1983.05	1873.6	1814.24	1582.01
HP0291	-0.185343	0.266875	0.312619	311.739	325.232	273.687	286.375
HP1510	-0.186535	0.180398	0.217838	592.58	697.137	560.071	572.75
HP0087	-0.187698	0.0457256	0.0609811	4835.4	4474.71	4036.18	4138.53
HP0543	-0.188468	0.103077	0.130157	1687.1	1455.02	1422.04	1335.95
fabZ	-0.18962	0.0676364	0.0876025	1775.68	1891.38	1592.75	1622.33
HP0525	-0.19035	0.111806	0.140041	914.619	876.421	782.971	786.836
HP1213	-0.191599	0.0476767	0.0633554	3092.68	2943.38	2580.28	2705.27
HP0258	-0.192443	0.0656544	0.0852587	1834.04	1720.99	1533.49	1577.84
HP0500	-0.194786	0.0394098	0.0530352	3567.84	3802.02	3198.19	3240.48
panB	-0.195492	0.0848886	0.108807	1457.76	1632.08	1290.84	1406.85
HP1214	-0.195839	0.109912	0.137785	987.404	894.943	795.668	848.003
HP0596	-0.196741	0.0337937	0.0460626	6552.02	7185.47	5975.97	6009.7
HP0671	-0.199731	0.0398192	0.053489	12529.3	14476.9	11657.1	11856.8
HP0169	-0.200877	0.0308838	0.0423297	3659.85	3716.09	3144.58	3272.46
HP0185	-0.202787	0.0243384	0.0338275	4835.4	4747.34	4130.7	4195.53
HP1564	-0.204122	0.0586843	0.0767449	24656.3	30683.6	23751.5	24286.3
HP0893	-0.204217	0.123901	0.154278	714.117	819.376	692.682	638.088
rplE	-0.206782	0.03539	0.0480617	7820.27	6815.79	6273.64	6408.68
HP0467	-0.207188	0.140794	0.173564	539.021	516.37	444.389	469.877
HP0304	-0.208518	0.0507507	0.0670795	1465.31	1535.03	1302.13	1294.25
HP0168	-0.208564	0.245195	0.28882	315.859	298.561	232.775	298.886
HP0539	-0.209449	0.327172	0.376997	173.036	171.876	152.362	145.968
HP0118	-0.212698	0.128812	0.159856	520.481	523.038	451.443	449.025
HP0180	-0.213865	0.118367	0.147635	687.337	605.272	572.768	542.166
HP0519	-0.215533	0.338431	0.388462	159.303	151.133	126.968	140.407
HP0888	-0.215918	0.0662448	0.0859501	1002.51	1065.34	915.582	864.685
HP0534	-0.218865	0.251179	0.2954	289.08	248.184	204.56	257.181
HP1250	-0.218913	0.0565877	0.0742652	1116.49	1145.35	933.922	1009.26
HP1181	-0.220068	0.0223156	0.0311913	2895.61	3052.29	2577.46	2528.72
tRNA-Glu-2	-0.222625	0.0335113	0.0457196	2053.77	2061.04	1668.93	1857.27
HP1247	-0.222738	0.100269	0.126876	686.651	610.458	553.017	558.848
secG	-0.223433	0.0286547	0.0394568	4338.26	4993.31	3896.51	4095.44
smpB	-0.223773	0.0331808	0.0453104	1581.36	1555.04	1334.58	1351.24
HP0891	-0.224194	0.0226985	0.0316669	3896.74	3516.8	3210.89	3136.22
HP0031	-0.224377	0.069524	0.0898119	2256.33	2900.41	2144.35	2268.76
HP0787	-0.227204	0.0464989	0.0619567	1593.03	1492.06	1227.36	1408.24
ureI	-0.227807	0.00567744	0.00848755	48182.3	47480.9	40824.5	40865.4
HP0073	-0.228659	0.00873178	0.0128465	64172.3	69901.1	57300.8	57120.7
HP0706	-0.229497	0.00871576	0.0128356	8799.43	8835.34	7697.1	7344.27
HP1090	-0.230224	0.0211598	0.0296318	2569.45	2495.17	2076.64	2240.95
HP1373	-0.232973	0.0121941	0.017712	4206.42	4011.68	3447.89	3544.93
HP0889	-0.233175	0.0304322	0.0417492	1446.77	1515.03	1283.79	1235.86
HP0967	-0.235164	0.0720914	0.0929665	653.692	653.427	555.839	554.678
fliG	-0.236218	0.0258122	0.0357418	2202.78	2443.31	1896.06	2047.72
HP0576	-0.238614	0.0243306	0.0338275	1893.78	1791.37	1623.78	1499.99
HP0616	-0.239353	0.0435924	0.0582935	1004.57	952.729	847.866	810.469
HP0064	-0.243197	0.320169	0.370344	123.597	146.688	107.218	120.945
HP1071	-0.24479	0.0523657	0.0690911	1257.26	1060.89	1025.62	931.414
HP0862	-0.247958	0.0476268	0.0633458	1389.78	1146.83	1041.14	1095.45
HP0479	-0.24993	0.433038	0.487957	68.6651	76.3072	63.4841	58.3871
HP1014	-0.250185	0.0098701	0.0144638	2820.08	2720.39	2286.84	2371.63
HP1287	-0.252557	0.0130371	0.0188258	1965.88	1980.28	1695.73	1616.77
HP0037	-0.2537	0.0377747	0.0509271	930.412	862.345	743.47	760.423
HP0859	-0.255079	0.0100652	0.0147061	2321.57	2237.36	1912.99	1907.31
HP1580	-0.258654	0.0753548	0.0969221	663.991	562.303	543.142	482.389
HP1254	-0.262415	0.262723	0.308243	146.943	138.538	118.504	119.555
metG	-0.262756	0.00380702	0.00580845	4425.46	4522.87	3713.12	3745.12
HP0676	-0.265171	0.103125	0.130157	414.737	387.463	300.491	367.005
HP0912	-0.265553	0.00244763	0.00382743	48156.9	52103	40889.4	42514.2
HP1225	-0.268642	0.103461	0.130359	347.445	334.122	292.027	273.863
HP0386	-0.273416	0.182083	0.219257	190.202	205.955	160.826	166.82
HP1078	-0.275848	0.432161	0.487372	77.5915	56.3043	66.3056	44.4854
HP0397	-0.277678	0.00238342	0.00373638	5922.36	5910.47	4706.29	5054.66
HP1581	-0.280034	0.0139502	0.020046	1242.15	1161.65	973.423	1006.48
HP1183	-0.281415	0.0123642	0.0179414	1632.86	1483.92	1338.81	1226.13
secF	-0.282165	0.00228026	0.00358984	3938.63	3850.92	3243.33	3162.64
HP0811	-0.282556	0.182147	0.219257	186.769	220.772	184.809	150.138
tRNA-Lys-1	-0.283856	0.416371	0.470281	69.3517	58.5269	62.0734	43.0953
porD	-0.283863	0.00316932	0.00487563	4083.51	4232.46	3263.08	3567.17
flhB	-0.285829	0.106188	0.133454	302.126	290.412	260.99	225.207
rplB	-0.286003	0.00167204	0.0026634	16590.2	18341.1	14125.9	14523.1
HP0758	-0.28619	0.00781101	0.0115146	1574.49	1486.88	1244.29	1266.44
HP1372	-0.287761	0.0154124	0.0219776	1767.44	1479.47	1302.13	1358.2
HP1365	-0.289566	0.0240963	0.0335538	707.25	734.179	595.34	583.871
HP1217	-0.291592	0.0343453	0.0467714	663.991	591.936	505.051	521.314
HP0086	-0.293276	0.000984883	0.00161034	6940.67	6920.99	5513.24	5798.4
HP0119	-0.296777	0.0287685	0.0395766	897.453	746.773	689.861	649.209
HP1480	-0.29984	0.00528693	0.00793575	3029.5	2619.63	2230.41	2359.12
HP0929	-0.300942	0.00198618	0.00314691	2631.93	2745.58	2168.34	2196.47
tmk	-0.302127	0.0309257	0.0423479	552.067	535.632	442.978	439.294
flhA	-0.30264	0.00158539	0.00253355	2858.53	2817.44	2323.52	2278.49
HP0160	-0.302905	0.00201504	0.00318922	3036.37	3218.98	2612.72	2457.82
HP1356	-0.306405	0.00733784	0.0108387	1678.17	1560.22	1218.9	1399.9
HP0655	-0.307786	0.000360383	0.000615723	8673.09	8645.68	7012.88	6978.65
fliA	-0.308187	0.00609308	0.00907233	1487.29	1345.38	1141.3	1146.89
HP0120	-0.308491	0.0169052	0.0239909	1106.19	934.948	860.562	788.226
HP0952	-0.309632	0.00514326	0.00774361	2040.73	2382.56	1794.48	1773.86
flgI	-0.311349	0.013528	0.0194777	1825.12	2352.93	1664.69	1701.57
tRNA-Val-1	-0.321887	0.0189593	0.0267777	844.581	703.804	608.037	631.137
tRNA-Leu-4	-0.32309	0.230307	0.272582	118.104	100.755	88.8778	86.1905
HP0969	-0.323932	0.00166534	0.0026556	2383.37	2230.69	1778.97	1907.31
HP0298	-0.324083	0.000447813	0.000758113	7674.01	8192.28	6554.38	6119.53
rpsD	-0.325523	0.000174098	0.000307733	13474.8	13912.4	10672.4	11182.5
murB	-0.326694	0.0445525	0.0594966	393.451	356.347	307.545	290.545
HP1075	-0.328177	0.00389996	0.00594413	1951.46	2286.99	1625.19	1750.22
clpX	-0.331879	0.000510975	0.000859156	4594.38	4234.68	3445.07	3569.96
HP0204	-0.333931	0.02115	0.0296318	545.887	621.57	488.122	437.903
HP0100	-0.334282	0.000770977	0.0012704	2300.28	2259.58	1781.79	1835.02
HP1191	-0.335596	0.00115017	0.0018662	1982.36	2108.45	1589.92	1651.52
rplD	-0.338157	0.000719806	0.00119005	8965.6	10458.5	7564.49	7800.24
HP0600	-0.34374	0.0628732	0.0817903	280.154	276.336	241.24	197.404
HP0269	-0.344836	9.99e-05	0.000180744	6083.04	6141.62	4764.13	4861.42
rplP	-0.345147	0.00122657	0.00198364	2422.5	2138.08	1805.77	1784.98
HP1388	-0.34692	0.182961	0.219892	124.97	111.868	98.7531	87.5807
HP1443	-0.35105	0.00249131	0.00388498	1444.03	1300.19	1031.26	1120.48
HP0776	-0.352709	0.00501093	0.00755204	776.602	797.151	616.501	615.845
HP1577	-0.354754	0.0132535	0.0191195	810.248	657.872	595.34	553.287
lolA	-0.35704	0.0258705	0.0357892	401.004	375.609	314.599	291.936
HP0313	-0.35798	0.00306612	0.00472667	1064.31	1160.91	822.472	913.341
HP1546	-0.359747	0.00991434	0.0145	709.31	612.68	506.462	524.094
HP0197	-0.360184	7.32e-05	0.000134789	4738.58	4885.88	3766.72	3731.21
HP0112	-0.360547	0.00259439	0.00403299	1080.79	1036.44	782.971	866.076
nrdF	-0.361093	0.00116057	0.00187897	1433.73	1574.3	1185.04	1156.62
HP1526	-0.361897	0.000425005	0.000722801	2000.21	1975.84	1589.92	1504.16
HP1293	-0.362937	3.44e-05	6.53e-05	15768.2	15129.6	11668.4	12357.2
HP1417m	-0.364019	0.00398068	0.00606093	1086.28	956.433	751.934	835.492
HP1229	-0.365222	0.000248364	0.000432305	2509.02	2664.08	1972.24	2043.55
HP1589	-0.368443	0.143668	0.176519	124.284	128.907	102.985	93.1414
rplF	-0.368793	5.68e-05	0.00010597	8727.33	8090.04	6359.7	6664.47
mraW	-0.369274	6.04e-05	0.000112332	4033.39	4005.76	3141.76	3082.01
HP0003	-0.370371	0.00106463	0.001735	1413.81	1571.34	1124.37	1184.42
HP0350	-0.371982	0.000211406	0.000371905	2172.56	2233.65	1726.77	1677.93
frr	-0.376235	0.00013209	0.000236011	2892.86	3088.59	2257.21	2350.78
HP0938	-0.376956	0.0858785	0.109886	195.009	166.69	141.076	137.627
HP0401	-0.376997	0.000318582	0.000546193	1731.73	1816.56	1362.79	1369.32
HP0107	-0.37777	0.000704464	0.00116728	2000.21	2271.44	1564.53	1722.42
HP1390	-0.381874	0.0538136	0.0708124	214.922	234.108	172.112	172.381
rpsC	-0.383484	1.93e-05	3.76e-05	10291.5	10281.5	7568.72	8202
fliM	-0.383962	0.00113141	0.00183977	1108.25	1043.85	804.132	845.223
HP0726	-0.384496	0.000528565	0.000886721	1530.54	1703.95	1245.7	1231.69
cysS	-0.385756	0.000212979	0.000373933	1739.29	1733.58	1340.22	1317.88
rnhA	-0.385919	0.0533203	0.0702256	238.954	220.031	160.826	190.453
HP0276	-0.388919	0.00185137	0.00293645	990.837	948.284	689.861	791.006
HP1121	-0.395245	0.00226554	0.00357046	821.234	912.723	692.682	625.576
HP0367	-0.398761	0.00654424	0.00972456	615.926	771.221	524.802	526.874
HP1466	-0.39897	8.56e-05	0.000156184	2408.77	2281.81	1825.52	1732.15
HP0282	-0.400401	0.000823362	0.00135371	993.584	1047.56	797.078	749.301
ispDF	-0.401797	6.44e-06	1.3e-05	6055.57	5901.58	4524.3	4526.39
HP0184	-0.402145	0.00102652	0.00167657	889.213	870.495	658.824	672.842
HP0924	-0.402273	0.0408377	0.054758	221.788	246.702	183.399	170.991
HP0355	-0.403252	5.34e-05	9.97e-05	2379.25	2287.73	1776.14	1753
HP0607	-0.404971	9.96e-05	0.000180353	7899.23	6649.84	5397.56	5591.26
HP0583	-0.40526	0.00104497	0.00170484	916.679	1017.92	720.897	739.57
HP1046	-0.407098	0.00123261	0.00198907	995.644	934.207	777.328	678.403
nusA	-0.40736	0.000218177	0.000382115	3832.89	4634	3117.78	3265.51
HP1245	-0.412224	1.1e-06	2.39e-06	14501.4	14439.8	10795.1	10953.1
HP1445	-0.412457	7.93e-06	1.6e-05	4153.55	4272.46	3129.06	3201.56
HP1230	-0.414443	0.000661097	0.00109788	1030.66	952.729	725.13	763.203
HP0791	-0.414597	7.63e-06	1.54e-05	4132.95	4047.24	3116.36	3020.84
HP0122	-0.415037	0.0209423	0.0294105	350.192	305.229	269.455	222.427
HP0266	-0.415562	0.000468272	0.000790943	1139.15	1047.56	806.954	832.711
HP0208	-0.417382	0.000610922	0.00101912	964.058	1061.63	747.702	768.764
HP1022	-0.417811	0.000192637	0.000340097	1575.86	1428.35	1138.48	1110.75
HP1540	-0.418742	1.41e-05	2.78e-05	2899.73	3006.36	2193.73	2224.27
HP0564	-0.420611	3.57e-05	6.76e-05	2025.62	2012.14	1527.85	1488.87
HP0320	-0.422531	0.000548157	0.000917513	1162.5	1364.64	953.673	931.414
rbfA	-0.423849	0.00150117	0.00240674	813.681	718.621	555.839	586.651
HP0406	-0.425434	0.0192812	0.0272064	272.6	295.598	217.257	205.745
HP1482	-0.4269	0.0001657	0.000293588	1442.65	1425.39	1004.46	1128.82
murG	-0.427793	3.13e-05	5.98e-05	2282.43	2475.91	1738.05	1798.88
HP0647	-0.431093	0.00207493	0.00328051	660.558	600.086	447.21	487.949
HP0659	-0.432467	2.82e-05	5.42e-05	2621.63	2374.41	1836.81	1865.61
HP0421	-0.435671	0.000152193	0.000270626	1325.24	1300.93	916.993	1024.55
HP0863	-0.43633	5.84e-06	1.19e-05	4798.32	4411	3320.92	3485.15
pheS	-0.438112	5.08e-05	9.52e-05	1906.83	1879.53	1478.47	1316.49
fliE	-0.438806	1.56e-06	3.36e-06	4522.97	4649.55	3395.69	3371.16
HP1248	-0.438884	0.000435217	0.000738474	897.453	854.196	626.377	665.891
HP0824	-0.439843	2.07e-06	4.39e-06	8841.32	9519.14	7003	6532.41
HP0347	-0.440754	0.00230448	0.00362028	527.348	520.074	396.423	375.346
truD	-0.441957	0.00322529	0.00495145	582.967	497.108	396.423	398.979
HP1081	-0.442667	0.0212074	0.0296704	279.467	249.665	211.614	177.942
HP1077	-0.447342	9.04e-05	0.000164315	1200.95	1166.83	880.313	856.344
HP0158	-0.453162	0.00229539	0.00360982	635.152	531.928	427.46	425.392
HP1569	-0.45658	0.00158509	0.00253355	543.827	520.815	397.834	378.126
HP0292	-0.458039	0.00014816	0.000264088	951.698	975.695	685.628	717.327
HP1235	-0.460491	0.0013148	0.0021194	544.514	532.669	397.834	385.077
HP1000	-0.461481	0.210449	0.250277	53.5588	62.2311	43.7335	40.3149
HP1331	-0.463719	0.000409985	0.000698057	849.387	796.41	636.252	557.458
HP0370	-0.466517	1.92e-07	4.43e-07	7415.14	7237.33	5442.71	5161.7
HP0651	-0.466781	7.28e-06	1.47e-05	1840.91	1805.44	1333.17	1305.37
HP0128	-0.467543	0.000622102	0.0010366	740.21	883.089	588.286	585.261
HP0199	-0.469664	0.00417612	0.00635199	530.094	435.618	378.083	319.739
HP0568	-0.470256	2.52e-05	4.87e-05	1437.16	1350.56	1018.57	993.971
HP0608	-0.470376	0.00765418	0.0112947	438.77	340.789	289.205	273.863
HP0772	-0.47076	1.67e-05	3.29e-05	1538.78	1483.17	1118.73	1062.09
HP1184	-0.470773	0.000112804	0.000202773	934.532	928.281	654.592	689.524
HP0149	-0.471323	2.5e-06	5.22e-06	2326.37	2377.38	1663.28	1729.37
xseA	-0.471429	3.74e-05	7.07e-05	1766.07	1546.15	1220.31	1169.13
HP0641	-0.474096	4.49e-06	9.24e-06	1889.66	1954.35	1389.6	1377.66
HP0222	-0.47513	1.3e-05	2.58e-05	1597.84	1506.88	1128.61	1105.18
HP1270	-0.476164	5.12e-05	9.58e-05	1468.06	1287.59	979.066	1002.31
rnc	-0.47693	0.000969285	0.00158659	536.274	537.855	400.655	371.175
HP1573	-0.477885	0.000200703	0.000353495	817.115	827.526	622.144	558.848
HP0861	-0.478871	2.19e-05	4.25e-05	1401.45	1311.3	990.352	956.437
HP1556	-0.480428	5.94e-06	1.21e-05	2008.45	2184.02	1458.72	1545.87
HP0285	-0.48183	0.000443915	0.000752372	736.776	653.427	506.462	489.34
HP0293	-0.481882	0.000275853	0.000476796	703.817	692.692	512.105	487.949
HP0450	-0.485968	0.341101	0.391224	25.4061	41.4874	31.0367	16.682
rplW	-0.486985	2.86e-07	6.49e-07	3306.22	3366.41	2350.32	2410.55
HP1513	-0.488903	6.87e-05	0.000127314	1671.31	1381.68	1070.77	1105.18
HP1357	-0.489425	4.56e-05	8.58e-05	1112.37	1022.37	763.22	757.642
HP0142	-0.489785	0.000581147	0.000971635	648.198	586.75	461.318	418.441
HP1196	-0.491087	7.92e-08	1.85e-07	4834.02	5037.02	3509.97	3512.96
HP1258	-0.49115	0.000101614	0.00018355	935.218	849.751	639.073	631.137
HP1343	-0.492617	0.000356404	0.000609627	806.815	688.246	537.499	525.484
HP0935	-0.494186	0.00448843	0.00681305	365.985	320.046	235.597	251.621
HP1537	-0.495254	0.0356372	0.048309	209.429	153.355	124.147	133.456
HP0029	-0.495949	5.29e-06	1.08e-05	2059.27	1838.78	1392.42	1372.1
HP0396	-0.496216	1.14e-07	2.65e-07	5584.53	5162.22	3803.4	3816.02
HP0555	-0.496744	0.00988862	0.0144766	271.227	242.257	176.345	187.673
HP1442	-0.497221	0.000450297	0.000761449	679.784	626.015	428.87	496.29
HP0953	-0.500146	8.74e-07	1.92e-06	2605.84	2857.45	1938.38	1923.99
HP0987	-0.503031	0.000130503	0.000233457	856.94	793.447	547.374	617.235
HP0141	-0.503151	1.31e-07	3.03e-07	4586.14	4374.7	3048.65	3273.85
HP0268	-0.503934	0.00252507	0.00392937	607.686	457.843	359.743	392.028
gcp	-0.507477	0.00112332	0.00182863	481.342	463.77	304.724	360.054
HP0737	-0.509194	0.000519351	0.000872251	567.174	514.888	386.548	373.956
HP1232	-0.510962	2.17e-05	4.22e-05	1099.33	1019.4	729.362	757.642
HP0022	-0.511511	2.2e-06	4.64e-06	1646.59	1563.19	1124.37	1127.43
tRNA-Trp-1	-0.513358	0.00138382	0.00222582	407.871	411.911	303.313	271.083
HP1346	-0.517551	6.4e-06	1.3e-05	2080.55	2407.01	1479.89	1654.3
HP0755	-0.517631	0.00284237	0.00440004	394.138	333.381	263.812	244.67
fliQ	-0.517876	0.0139706	0.020046	243.074	197.806	158.005	150.138
HP0054	-0.518606	6.43e-05	0.000119482	1192.71	1069.04	861.973	717.327
HP0741	-0.518998	0.000300847	0.000518183	573.353	542.3	396.423	382.297
tgt	-0.522788	1.89e-05	3.69e-05	967.491	1049.04	713.844	689.524
HP0418	-0.527329	1e-05	2e-05	1351.33	1193.5	898.653	867.466
HP0702	-0.528096	0.000500485	0.000842473	548.634	480.809	351.279	362.834
HP0734	-0.528617	2.33e-06	4.89e-06	1555.95	1454.28	1077.82	1009.26
HP0819	-0.528657	0.00915993	0.0134497	305.56	245.961	215.846	166.82
HP1112	-0.530547	6.28e-07	1.4e-06	2588.67	2329.22	1643.53	1761.34
HP1572	-0.531818	1.18e-06	2.56e-06	1470.81	1535.77	1028.44	1050.97
HP0810	-0.531889	0.0264005	0.0364543	181.276	150.392	101.575	127.896
HP0159	-0.532082	4.13e-06	8.54e-06	1261.38	1202.39	826.704	877.197
hemC	-0.538467	1.88e-05	3.68e-05	1430.29	1212.02	957.905	861.905
HP0462	-0.539695	0.0611599	0.0797715	104.371	97.0509	64.8949	73.679
HP0465	-0.540646	0.000240518	0.00041914	533.528	505.257	361.154	353.103
HP0765	-0.540795	0.026361	0.0364337	139.39	154.096	101.575	100.092
lpxB	-0.543452	3.71e-05	7.02e-05	745.703	713.435	499.408	501.851
HP1381	-0.548388	0.00478977	0.00724819	288.393	243.739	177.756	186.283
HP1159	-0.549367	7.26e-05	0.000133965	642.019	620.089	417.584	444.854
HP0885	-0.551305	8.21e-05	0.000150002	674.978	759.368	458.496	519.923
acpS	-0.554447	0.00903977	0.0132864	249.941	200.029	145.308	161.26
HP0642	-0.560729	7.75e-05	0.000141877	1561.44	2176.61	1289.43	1244.2
pheT	-0.561089	1.25e-09	3.22e-09	4396.63	4286.54	2916.04	2969.4
rplX	-0.561201	4.27e-07	9.6e-07	1632.86	1503.18	1053.84	1071.82
HP0043	-0.566276	5.98e-09	1.49e-08	2815.27	2821.14	1929.92	1876.73
HP0537	-0.567406	1.75e-06	3.73e-06	1160.44	1089.04	775.917	742.35
HP0916	-0.567614	1.73e-06	3.7e-06	1069.12	1139.42	742.059	747.911
HP0939	-0.568145	5.3e-05	9.91e-05	631.032	708.249	434.514	468.487
HP0202	-0.5686	2.44e-09	6.22e-09	5881.85	5341.5	3806.23	3761.8
tRNA-Arg-4	-0.568649	8.89e-06	1.79e-05	1422.74	1791.37	1094.75	1071.82
HP0099	-0.572635	2.7e-09	6.83e-09	6288.35	7048.41	4505.96	4461.05
HP0936	-0.576146	1.03e-05	2.06e-05	757.376	800.114	509.284	535.215
rpsI	-0.578523	2.54e-09	6.44e-09	3488.19	3370.11	2368.66	2224.27
HP1042	-0.578654	3.62e-07	8.16e-07	1292.28	1296.48	840.812	892.489
HP1464	-0.584489	8.52e-08	1.99e-07	2051.71	1855.08	1269.68	1335.95
HP0518	-0.586595	1.69e-07	3.89e-07	2181.49	1895.09	1335.99	1379.05
gltX	-0.588425	9.76e-11	2.68e-10	5034.52	5177.78	3385.82	3405.92
rplQ	-0.590155	1.49e-10	4.04e-10	4954.87	4831.8	3184.08	3316.94
HP0840	-0.593435	1.94e-08	4.68e-08	2633.99	2644.08	1632.25	1865.61
HP1067	-0.5951	6.69e-07	1.49e-06	2700.6	3341.96	1900.29	2099.16
HP0257	-0.599554	4.98e-07	1.12e-06	1606.08	1386.86	960.726	1014.82
HP1355	-0.600793	3.86e-06	7.99e-06	934.532	829.748	574.179	589.432
HP1481	-0.602488	8.84e-09	2.17e-08	2493.92	2284.03	1612.5	1534.75
HP0648	-0.611441	2.16e-09	5.51e-09	2390.92	2261.8	1503.87	1541.7
HP0201	-0.613667	2.44e-11	6.89e-11	10297.7	9604.33	6715.21	6291.91
tRNA-Val-2	-0.623198	0.00349379	0.00534705	206.682	231.144	126.968	157.089
HP1079	-0.62378	0.000109844	0.000197932	417.484	404.502	260.99	272.473
HP1493	-0.62439	4.49e-07	1.01e-06	920.799	966.064	605.215	618.625
HP0630	-0.624729	7.92e-08	1.85e-07	7570.33	9713.98	5717.8	5491.17
HP0177	-0.625162	3.17e-12	9.46e-12	6582.92	6464.63	4309.87	4149.66
HP1379	-0.625244	4.24e-12	1.25e-11	6564.38	6452.03	4116.59	4322.04
HP0288	-0.626981	1.5e-06	3.22e-06	789.648	763.072	506.462	499.071
HP0278	-0.628252	1.2e-09	3.1e-09	3810.23	4365.07	2594.38	2694.15
HP0101	-0.629956	7.35e-05	0.000135234	471.729	425.246	293.438	286.375
HP1495	-0.6324	5.01e-09	1.26e-08	1669.25	1729.88	1066.53	1126.04
HP1446	-0.632627	1.55e-10	4.2e-10	3496.43	3640.52	2200.78	2402.21
miaA	-0.633504	8.45e-07	1.86e-06	812.308	860.864	548.785	529.655
HP0841	-0.634314	2.82e-09	7.09e-09	2103.9	2124.75	1288.02	1436.05
surE	-0.634479	8.45e-10	2.19e-09	2671.76	2442.57	1625.19	1669.59
HP0354	-0.639957	3.49e-10	9.25e-10	2807.03	2875.97	1732.41	1914.26
HP0395	-0.643712	7.89e-05	0.000144315	676.351	513.407	392.191	369.785
rplI	-0.645888	3.56e-09	8.94e-09	1548.4	1594.3	1025.62	982.85
def	-0.647314	3.41e-10	9.06e-10	2060.64	2018.81	1297.9	1306.76
HP1082	-0.64795	7.65e-09	1.89e-08	1349.96	1360.19	871.849	857.735
HP0387	-0.649621	2.91e-07	6.61e-07	1051.26	934.207	630.609	635.307
HP0178	-0.654425	1.84e-08	4.44e-08	1389.09	1277.96	867.616	827.151
HP0174	-0.654487	0.000297016	0.00051218	308.306	355.606	220.078	201.575
HP0578	-0.657362	3.08e-05	5.89e-05	602.193	528.964	397.834	319.739
HP1276	-0.659441	0.0365753	0.0494543	120.164	80.7523	56.4303	70.8986
HP0051	-0.661238	5.04e-06	1.03e-05	698.324	861.605	505.051	480.999
engB	-0.664342	1e-05	2.01e-05	714.117	624.534	465.55	379.516
HP0487	-0.670321	2.54e-13	8.02e-13	8979.33	8268.59	5373.58	5464.76
HP0579	-0.670864	0.00550018	0.00823916	191.576	162.986	129.79	93.1414
truA	-0.676578	1.97e-05	3.85e-05	563.74	480.809	306.135	347.542
HP1489	-0.678343	9.95e-12	2.86e-11	2998.6	2840.41	1783.2	1865.61
HP0887	-0.678463	2.5e-13	7.93e-13	93418.2	106266	62311.8	62456.1
HP1259	-0.680357	5.18e-09	1.3e-08	1326.61	1231.29	791.435	804.908
HP1571	-0.680697	1.78e-06	3.79e-06	783.469	663.799	448.621	454.585
HP0970	-0.683013	0.000116718	0.000209301	386.584	330.418	231.364	215.476
HP0162	-0.683627	9.16e-10	2.37e-09	1520.24	1468.36	902.885	957.827
HP1364	-0.68557	1.72e-06	3.67e-06	650.945	591.936	380.905	392.028
HP0728	-0.685657	0.000840207	0.00137987	273.974	228.181	166.469	145.968
queA	-0.686331	1.62e-06	3.47e-06	780.722	678.615	424.638	482.389
HP0383	-0.688213	0.0410155	0.0549466	74.8449	76.3072	43.7335	50.0461
trpA	-0.690316	1.28e-07	2.98e-07	1062.25	920.872	592.518	636.698
era	-0.691438	2.43e-10	6.49e-10	2116.94	1941.02	1207.61	1305.37
HP0044	-0.697549	8.71e-13	2.66e-12	2888.74	2850.04	1762.04	1776.64
HP0524	-0.698681	6.51e-10	1.7e-09	1675.43	1521.7	967.78	1002.31
fliH	-0.698697	3.52e-06	7.29e-06	633.092	555.635	389.369	343.372
HP0306	-0.700124	6.45e-13	2e-12	4923.97	4711.78	3110.72	2820.65
rpsF	-0.70066	1.06e-08	2.57e-08	2685.49	2140.31	1453.08	1516.67
HP0252	-0.702525	2.85e-16	1.09e-15	11298.2	11160.1	6881.68	6918.87
thrS	-0.702563	6.23e-15	2.18e-14	7787.31	7569.97	4589.2	4847.52
ureE	-0.706262	1.81e-15	6.54e-15	7273.69	7188.43	4500.32	4363.74
ribA	-0.706467	5.34e-07	1.19e-06	705.877	771.221	488.122	417.051
tpiA	-0.706843	1.02e-08	2.48e-08	1058.82	1065.34	688.45	613.065
HP1525	-0.71284	1.14e-10	3.13e-10	2327.06	2038.07	1340.22	1323.44
HP0856	-0.714546	9.26e-06	1.86e-05	556.187	461.547	321.653	298.886
HP1463	-0.722303	4.1e-10	1.08e-09	1839.54	1602.45	1051.01	1035.68
HP1338	-0.722789	1.71e-05	3.36e-05	428.47	380.054	238.418	251.621
HP0277	-0.7235	9.18e-06	1.84e-05	433.963	500.812	299.081	266.913
HP0015	-0.726733	0.0164911	0.0234256	98.1911	94.0875	55.0196	61.1675
HP0318	-0.733388	1.13e-14	3.89e-14	7678.82	8523.44	4958.82	4786.35
HP1387a	-0.736539	0.0495259	0.0655641	78.9648	56.3043	47.9658	33.3641
HP0635	-0.739295	3.23e-11	9.06e-11	2537.17	2209.2	1376.9	1466.63
HP0792	-0.740737	2.47e-15	8.87e-15	4053.99	3982.05	2418.04	2391.09
algC	-0.742985	2.15e-13	6.84e-13	3117.39	2960.42	1742.29	1889.24
HP0558	-0.744655	5.03e-18	2.09e-17	17353.7	16535	10079.9	10145.5
HP0473	-0.7453	2e-06	4.26e-06	521.168	464.511	296.259	291.936
HP0801	-0.746559	0.000194885	0.000343655	271.914	240.034	149.54	155.699
flgG	-0.749677	4.75e-15	1.68e-14	4682.96	5071.84	2856.79	2944.38
HP0771	-0.750999	1.7e-05	3.34e-05	494.389	396.353	284.973	244.67
uvrC	-0.752074	7.87e-09	1.94e-08	837.714	822.34	475.426	510.192
HP1350	-0.755793	3.3e-16	1.25e-15	6876.12	6622.43	3852.78	4141.31
HP0851	-0.758238	6.11e-09	1.52e-08	812.308	869.754	500.819	493.51
clpP	-0.758546	2.05e-13	6.54e-13	2140.98	2104.75	1269.68	1240.03
HP0337	-0.759281	0.000648117	0.00107753	243.074	190.398	129.79	126.505
HP1283	-0.76053	2.45e-09	6.24e-09	872.733	863.827	512.105	512.973
HP0507	-0.761843	2.48e-11	6.99e-11	1322.49	1353.53	775.917	802.128
HP0248	-0.762109	2.5e-15	8.96e-15	4380.15	4326.54	2457.54	2676.08
HP0279	-0.762757	1.92e-11	5.45e-11	1636.29	1823.22	990.352	1048.19
HP1542	-0.764147	0.000336564	0.000576356	217.668	210.4	126.968	125.115
HP0624	-0.767451	5.45e-14	1.83e-13	2428.68	2426.27	1382.54	1469.41
HP0274	-0.768806	0.000276743	0.000477777	220.415	245.22	149.54	123.725
HP0379	-0.769156	3.25e-12	9.68e-12	1799.71	1752.84	990.352	1094.06
HP0245	-0.771087	8.25e-07	1.82e-06	519.108	608.976	310.367	350.323
rplV	-0.771153	2.77e-16	1.07e-15	6247.84	6183.11	3471.88	3811.84
HP0657	-0.771571	6.14e-13	1.91e-12	3451.79	3053.03	1819.88	1990.72
HP0860	-0.773055	1.31e-06	2.84e-06	585.713	490.44	297.67	332.25
rplO	-0.774587	5.38e-11	1.5e-10	2774.07	2274.4	1443.21	1508.33
HP0530	-0.776611	5.45e-08	1.28e-07	744.33	648.982	402.066	411.49
HP1172	-0.778884	6.34e-11	1.76e-10	3208.03	4033.91	2171.16	2049.11
HP0362	-0.779416	1.51e-09	3.89e-09	981.224	886.052	544.553	543.556
secY	-0.78187	5.84e-17	2.31e-16	14011.1	12570.7	7860.74	7600.06
hemA	-0.784125	2.73e-12	8.17e-12	2307.15	2003.99	1251.34	1252.54
HP0127	-0.787496	2.12e-19	9.4e-19	22930	24447.9	13462.9	13985.1
HP0552	-0.791678	1.19e-13	3.85e-13	3144.17	2750.76	1702.79	1702.96
HP1332	-0.792594	1.92e-13	6.17e-13	1734.48	1773.59	1029.85	995.361
HP0644	-0.792651	2.8e-09	7.07e-09	762.182	814.931	459.907	450.415
rpsR	-0.799805	4.78e-12	1.41e-11	2958.78	2480.35	1496.81	1627.89
HP0284	-0.800776	2.29e-07	5.25e-07	696.264	564.525	368.208	355.883
tRNA-Ile-1	-0.802611	0.00683349	0.0101038	115.357	97.0509	63.4841	58.3871
HP0775	-0.80643	3.52e-15	1.25e-14	3118.77	2844.85	1731	1679.32
HP0757	-0.808225	2.03e-10	5.46e-10	970.238	910.5	547.374	526.874
HP0762	-0.8136	1.22e-06	2.65e-06	416.11	391.167	237.007	222.427
HP1430	-0.816575	2.04e-18	8.7e-18	19062.8	17275.1	9968.42	10664
HP1511	-0.819293	1.39e-05	2.76e-05	308.306	289.671	176.345	162.65
HP0739	-0.821122	1.27e-10	3.47e-10	951.011	891.979	520.57	522.704
HP0527	-0.821741	4.9e-13	1.53e-12	2858.53	2403.31	1501.05	1476.36
HP1185	-0.823219	1.35e-10	3.69e-10	876.853	924.576	502.23	515.753
HP0656	-0.823518	7.33e-13	2.26e-12	1746.15	1563.93	915.582	955.046
HP0549	-0.8245	7.01e-14	2.32e-13	2278.31	2084.74	1172.34	1291.47
HP1340	-0.825487	3.91e-18	1.63e-17	4214.66	4345.81	2348.91	2481.45
HP1021	-0.829122	1.8e-14	6.16e-14	2395.04	2193.65	1240.06	1342.9
flgA	-0.830083	3.68e-07	8.29e-07	609.746	487.477	300.491	316.959
rplA	-0.83129	5.46e-19	2.38e-18	13041.6	14603.6	7738.01	7798.85
HP0598	-0.833311	5.11e-15	1.8e-14	2072.31	2146.23	1137.07	1230.3
HP1330	-0.835423	0.000213064	0.000373933	237.581	226.699	102.985	157.089
murC	-0.836892	1.86e-11	5.28e-11	1210.57	1131.27	698.325	613.065
HP0740	-0.841414	9.3e-14	3.05e-13	1542.22	1515.77	819.651	886.928
HP0115	-0.842026	4.71e-13	1.47e-12	2728.75	3344.92	1711.25	1676.54
HP1487	-0.858429	9.8e-14	3.2e-13	1856.02	1632.08	967.78	956.437
HP1531	-0.858523	0.0044683	0.00678943	108.491	97.0509	53.6088	59.7773
HP0646	-0.861657	1.2e-16	4.67e-16	2543.35	2359.6	1338.81	1359.59
HP1223	-0.862059	9.87e-14	3.22e-13	1466	1356.49	777.328	775.715
HP1476	-0.86263	6.18e-11	1.72e-10	899.513	829.007	465.55	485.169
HP0958	-0.862804	4.66e-15	1.65e-14	2364.14	2261.06	1183.63	1359.59
HP0148	-0.863179	2.92e-10	7.78e-10	729.223	774.185	427.46	398.979
HP0621	-0.863323	3.66e-13	1.15e-12	1762.63	1532.81	878.902	932.804
hemH	-0.865868	2.39e-11	6.77e-11	876.166	864.568	490.944	464.317
HP0163	-0.868662	4.67e-17	1.86e-16	2307.15	2449.24	1297.9	1306.76
HP0272	-0.869407	8.46e-12	2.45e-11	1030.66	946.802	550.196	532.435
HP1478	-0.870117	2.27e-13	7.2e-13	1458.45	1310.56	754.756	760.423
HP0538	-0.870926	1.32e-08	3.2e-08	580.22	528.224	289.205	316.959
HP1092	-0.875338	2.25e-15	8.12e-15	1989.91	1823.96	1014.34	1064.87
HP1429	-0.876833	6.08e-14	2.02e-13	4227.02	3418.27	2011.74	2151.98
HP1161	-0.885407	5.91e-21	2.87e-20	23780.1	26959.4	13984.8	13481.9
HP1490	-0.885526	1.2e-19	5.42e-19	3652.3	3577.55	2023.03	1890.63
HP0522	-0.887994	1.86e-19	8.27e-19	3246.49	3092.29	1718.3	1707.13
HP0567	-0.891772	1.15e-06	2.5e-06	335.772	357.829	169.291	204.355
HP0606	-0.894537	1.33e-15	4.85e-15	2042.79	1840.26	1015.75	1073.21
HP0620	-0.897025	7.92e-16	2.94e-15	1532.6	1578.74	837.99	832.711
HP0721	-0.903833	2.62e-25	1.63e-24	30006.6	31886	16194.1	16885
HP0957	-0.904051	3.88e-18	1.62e-17	2291.35	2249.21	1177.98	1248.37
HP0594	-0.907914	0.0687957	0.0890262	35.0192	38.524	15.5183	23.6329
rplL	-0.909022	1.73e-21	8.54e-21	6550.65	5947.52	3337.85	3318.33
HP1029	-0.911511	4.33e-10	1.13e-09	672.918	609.717	347.047	335.031
HP0016	-0.920159	1.63e-06	3.49e-06	316.546	303.747	180.577	147.358
fliF	-0.921136	2.28e-19	1.01e-18	2907.28	2951.53	1472.83	1620.94
HP0085	-0.922852	2.61e-12	7.83e-12	1012.81	934.948	479.658	547.727
rpmG	-0.924254	6.6e-13	2.04e-12	901.573	943.098	495.176	476.828
HP0498	-0.924292	5.06e-15	1.78e-14	1893.78	1662.46	980.477	893.879
coaD	-0.927723	2.01e-09	5.14e-09	533.528	505.257	273.687	272.473
HP1414	-0.928578	3.82e-10	1.01e-09	672.918	611.198	317.421	357.274
HP1378	-0.929762	1.39e-19	6.21e-19	2711.58	2729.28	1489.76	1366.54
HP1001	-0.930104	0.0188791	0.0266899	66.6051	53.341	29.6259	33.3641
HP0736	-0.931195	2.72e-16	1.05e-15	1631.48	1590.6	802.721	886.928
gatC	-0.93138	3.77e-11	1.05e-10	782.782	720.103	371.029	417.051
HP1228	-0.931493	6.82e-16	2.54e-15	1646.59	1658.76	808.364	924.463
tolB	-0.932766	2.72e-17	1.09e-16	2302.34	2049.18	1142.71	1137.16
HP0835	-0.932832	5.05e-10	1.32e-09	591.893	571.193	320.242	289.155
HP1530	-0.932847	5.85e-07	1.31e-06	313.113	352.643	165.059	183.502
HP0004	-0.934358	2.21e-15	8e-15	1275.11	1318.71	699.736	657.55
HP1015	-0.934516	3.76e-12	1.11e-11	973.671	851.233	478.247	476.828
HP0499	-0.947827	1.08e-12	3.3e-12	967.491	860.864	474.015	474.048
HP1544	-0.949161	1.53e-11	4.36e-11	842.521	733.438	413.352	403.149
HP0240	-0.951439	5.87e-15	2.06e-14	1928.12	1626.16	887.367	950.876
HP1272	-0.954035	3.39e-20	1.59e-19	5466.43	4801.43	2546.42	2753.93
HP0838	-0.955795	1.84e-21	9.04e-21	2765.14	2688.53	1388.19	1423.53
HP0581	-0.955912	1.09e-14	3.77e-14	1129.54	1067.56	551.606	581.091
HP0842	-0.95753	1.99e-08	4.79e-08	540.394	445.99	234.186	273.863
HP0977	-0.961737	1.21e-20	5.8e-20	2278.99	2248.47	1159.64	1164.96
HP0139	-0.962512	5.19e-23	2.83e-22	3716.84	3960.57	1990.58	1949.02
HP0067	-0.963362	4.13e-24	2.41e-23	10003.1	9135.38	4730.27	5085.24
HP1339	-0.966073	1.71e-23	9.62e-23	5390.9	5180	2831.39	2580.15
HP0394	-0.966089	1.23e-08	2.99e-08	556.874	446.73	262.401	251.621
HP0175	-0.97037	2.31e-26	1.49e-25	15635.7	17202.5	8252.94	8506.45
HP0529	-0.987317	5.69e-14	1.9e-13	1196.15	1024.59	574.179	546.337
rpsQ	-0.989113	1.13e-11	3.26e-11	1051.95	840.861	499.408	454.585
HP0053	-0.990199	8.06e-07	1.78e-06	304.186	263.001	139.665	145.968
HP0236	-0.990828	1.08e-09	2.8e-09	468.983	457.843	241.24	225.207
HP0703	-0.990893	1.37e-12	4.14e-12	1026.54	889.757	442.978	521.314
thyX	-0.995239	7.33e-10	1.91e-09	527.348	477.105	238.418	265.522
HP0193	-1.00559	4.68e-24	2.71e-23	4166.6	4601.4	2209.25	2157.54
HP0057	-1.00654	1.66e-29	1.27e-28	9323.35	8863.49	4551.11	4501.37
rplN	-1.00787	3.38e-23	1.87e-22	4210.54	3879.07	2099.21	1923.99
infC	-1.01627	2.02e-19	8.98e-19	1789.41	1665.42	830.937	877.197
HP1136	-1.02266	3.91e-18	1.63e-17	1316.31	1338.71	674.342	632.527
HP0769	-1.02553	0.000157641	0.000279978	146.943	140.761	59.2518	82.02
HP1462	-1.02665	6.82e-12	1.98e-11	981.224	769.74	426.049	433.733
HP1479	-1.02708	5.13e-18	2.11e-17	2706.09	2274.4	1159.64	1284.52
HP1299	-1.02711	3.67e-32	3.13e-31	10711.1	10837.1	5222.63	5350.76
HP1273	-1.03226	1.47e-26	9.64e-26	5337.34	4951.08	2446.25	2584.32
HP0095	-1.03498	4.33e-08	1.03e-07	310.366	326.713	152.362	158.479
HP0050	-1.03844	0.00071596	0.00118501	109.177	100.755	52.1981	50.0461
rplK	-1.05074	2.56e-26	1.64e-25	7695.3	8818.3	3989.62	3981.45
HP1227	-1.05183	4.32e-29	3.22e-28	5457.5	5485.23	2546.42	2731.68
lysS	-1.05542	1.91e-26	1.24e-25	4182.39	3886.48	1887.59	1994.89
HP1123	-1.06146	1.64e-22	8.58e-22	2333.93	2171.42	1036.91	1121.87
HP1074	-1.06395	4.45e-16	1.67e-15	1317.68	1114.97	596.751	567.189
HP0575	-1.06596	2.06e-13	6.56e-13	930.412	871.236	375.262	485.169
HP1006	-1.06698	1.6e-10	4.32e-10	869.987	631.201	348.457	368.395
prmA	-1.07052	4.76e-29	3.53e-28	4027.89	3959.08	1866.43	1936.51
HP0523	-1.07086	4.68e-12	1.38e-11	850.76	680.838	342.814	386.467
HP0410	-1.07252	1.09e-31	9.13e-31	8046.86	8099.68	3982.57	3695.07
HP0256	-1.07272	2.02e-12	6.07e-12	701.071	608.976	294.848	328.08
fabG	-1.0766	2.5e-35	2.41e-34	14760.9	14985.8	7216.03	6888.29
HP0307	-1.08004	5.55e-14	1.86e-13	744.33	724.548	373.851	321.129
HP0828	-1.08141	7.02e-29	5.15e-28	4027.21	4236.16	1996.22	1908.7
HP1282	-1.08461	9.43e-19	4.07e-18	1365.06	1233.51	626.377	599.163
HP0971	-1.08809	3.13e-11	8.8e-11	593.266	516.37	237.007	284.985
HP0934	-1.08858	4.22e-08	1e-07	396.198	308.933	152.362	179.332
HP0495	-1.08987	5.34e-07	1.19e-06	237.581	227.44	114.271	104.263
HP0956	-1.09355	2.87e-16	1.09e-15	941.398	874.94	409.12	442.074
HP1072	-1.09611	1.12e-24	6.67e-24	2797.42	2515.91	1245.7	1240.03
HP1341	-1.10275	1.14e-32	9.87e-32	4919.85	4929.59	2284.02	2302.12
HP0553	-1.10887	7.17e-15	2.5e-14	965.431	809.745	402.066	421.221
HP1451	-1.11378	1.92e-20	9.12e-20	2033.17	1816.56	822.472	956.437
HP0190	-1.11401	1.53e-27	1.07e-26	3594.62	3967.23	1698.55	1794.71
HP0181	-1.12156	9.96e-25	5.96e-24	2855.09	2547.77	1285.2	1198.33
HP0398	-1.12319	5.32e-25	3.24e-24	2106.64	1983.25	921.225	956.437
HP0244	-1.12644	3.8e-18	1.59e-17	1029.98	1045.33	444.389	506.022
HP0526	-1.12775	1.64e-07	3.79e-07	341.265	261.519	155.183	120.945
HP1295	-1.13069	8.42e-33	7.35e-32	5224.04	4921.44	2295.3	2338.26
HP0700	-1.13086	7.94e-11	2.2e-10	441.516	398.575	194.685	189.063
HP1486	-1.1338	1.02e-14	3.52e-14	1238.72	1017.92	457.086	571.36
HP1034	-1.13905	3.25e-23	1.8e-22	1516.81	1509.1	703.968	670.062
rplC	-1.13926	1.91e-27	1.32e-26	9797.13	11763.9	4851.6	4936.49
rpsL	-1.13986	4.59e-22	2.34e-21	3517.03	3002.65	1364.2	1594.52
HP1497	-1.14173	2.57e-22	1.32e-21	1790.1	1901.01	773.095	899.44
HP0622	-1.15273	4.31e-10	1.13e-09	347.445	368.942	169.291	152.919
acpP	-1.15773	6.96e-15	2.43e-14	1754.39	1289.07	726.54	638.088
hemD	-1.15904	1.39e-12	4.19e-12	599.446	519.333	231.364	269.693
HP1135	-1.15984	1.72e-21	8.54e-21	1737.91	1517.99	699.736	757.642
HP0508	-1.16079	2.25e-26	1.46e-25	2019.44	2075.11	878.902	952.266
HP1348	-1.16231	8.63e-17	3.38e-16	1062.25	889.757	433.103	439.294
rpmC	-1.1674	4.97e-34	4.55e-33	4204.36	4057.62	1815.65	1862.83
HP0371	-1.17099	7.8e-28	5.48e-27	3113.96	3555.32	1465.78	1495.82
rho	-1.17821	3.51e-38	3.91e-37	9651.56	9080.56	4048.88	4228.9
HP0378	-1.17878	9.78e-41	1.2e-39	8807.67	8811.63	3857.01	3925.84
HP0249	-1.18346	2.24e-16	8.64e-16	760.809	695.655	323.064	318.349
HP1274	-1.18403	3.99e-24	2.34e-23	3174.39	2674.46	1223.13	1351.24
HP1488	-1.18487	3.88e-20	1.81e-19	1198.21	1068.3	506.462	490.73
HP0554	-1.18584	2.81e-17	1.12e-16	1077.36	897.165	430.281	437.903
trmE	-1.18834	2.16e-23	1.21e-22	2066.13	1775.07	822.472	863.295
HP0735	-1.19197	2.81e-16	1.08e-15	716.177	720.844	337.171	291.936
HP0280	-1.19763	5.46e-24	3.15e-23	1640.41	1863.97	746.291	781.275
HP1347	-1.20312	2.02e-10	5.44e-10	366.672	332.64	143.897	159.869
HP0098	-1.20528	3.38e-41	4.21e-40	7509.9	7604.05	3233.46	3321.11
rpsU	-1.22525	1.11e-36	1.13e-35	3996.31	3885	1715.48	1655.69
nusG	-1.23543	4.87e-37	5.2e-36	4924.66	5282.24	2107.67	2227.05
HP0356	-1.2557	1.81e-13	5.87e-13	563.74	468.956	210.203	222.427
HP0229	-1.25999	7.02e-38	7.77e-37	9549.25	8480.47	3665.15	3863.28
HP0150	-1.26692	1.16e-21	5.86e-21	1007.32	954.21	424.638	390.638
HP0273	-1.27002	1.68e-10	4.53e-10	405.124	320.787	160.826	140.407
HP1137	-1.27953	4.46e-30	3.48e-29	1965.19	1996.58	860.562	771.544
rpsA	-1.29269	3.18e-51	5.42e-50	15838.3	16168.2	6461.27	6603.3
rpsE	-1.30614	1.15e-48	1.81e-47	8162.91	8121.9	3263.08	3322.5
rpmE	-1.30646	8.24e-23	4.4e-22	1165.25	1040.15	424.638	467.097
HP1578	-1.30734	6.64e-23	3.6e-22	1169.37	1027.55	448.621	439.294
HP0687	-1.31084	8.38e-35	8.02e-34	4921.91	5717.85	2069.58	2218.71
tig	-1.31474	1.62e-47	2.33e-46	6751.15	6604.65	2681.85	2687.2
trmD	-1.32535	3.24e-25	1.99e-24	1274.42	1160.17	466.961	504.632
HP0544	-1.3272	5.22e-36	5.19e-35	4926.72	4254.68	1850.91	1808.61
HP0189	-1.33384	6.41e-22	3.25e-21	1350.64	1742.47	613.68	613.065
HP0327	-1.3369	2.25e-05	4.36e-05	138.017	102.237	43.7335	51.4363
rpsT	-1.33884	5.44e-45	7.33e-44	5945.02	5625.25	2227.59	2346.61
HP1498	-1.34274	5.47e-25	3.32e-24	1393.9	1240.18	483.89	554.678
HP0855	-1.3518	1.03e-19	4.69e-19	784.155	749.737	330.117	271.083
HP0492	-1.35317	1.68e-23	9.53e-23	883.033	923.836	354.1	353.103
HP1160	-1.35723	8.14e-37	8.45e-36	2243.29	2216.61	887.367	853.564
HP1073	-1.35982	3.58e-18	1.5e-17	614.553	651.204	266.633	226.598
HP0377	-1.36529	1.07e-39	1.26e-38	2841.36	2973.76	1097.57	1159.4
HP1566	-1.3682	0.000126786	0.000227082	92.0112	81.4931	36.6797	30.5837
HP1349	-1.3832	6.33e-30	4.87e-29	2357.27	1973.62	808.364	852.174
HP1122a	-1.39148	4.34e-36	4.35e-35	2616.14	2980.43	1084.87	1048.19
HP0557	-1.40889	2.6e-45	3.58e-44	5590.71	5130.36	1944.02	2093.6
HP1016	-1.40894	3.38e-18	1.42e-17	604.253	540.818	217.257	214.086
rplR	-1.41501	1.53e-39	1.78e-38	4431.64	3820.55	1553.24	1541.7
HP0582	-1.41837	6.03e-23	3.28e-22	784.842	779.371	277.919	307.227
HP1590	-1.42911	7.22e-05	0.000133323	77.5915	107.423	36.6797	31.9739
HP1039	-1.46412	9.82e-31	7.95e-30	2502.16	2012.88	797.078	839.662
HP0129	-1.48443	8.31e-38	9.07e-37	1794.91	1767.66	665.878	607.504
HP1449	-1.50304	9.65e-40	1.14e-38	1945.97	2054.37	674.342	736.79
HP0756	-1.50836	0.0915222	0.116705	13.0464	14.8169	2.82152	6.95085
HP1428	-1.51293	6.67e-29	4.92e-28	2662.83	2038.81	782.971	864.685
HP0068	-1.529	2.43e-53	4.34e-52	5825.55	5274.09	1887.59	1958.75
HP1545	-1.5354	2.99e-23	1.67e-22	943.458	760.849	294.848	293.326
HP1579	-1.54654	2.06e-10	5.53e-10	307.62	240.775	115.682	72.2888
HP1448	-1.54727	5.2e-56	1.04e-54	4230.46	4313.95	1417.81	1505.55
rplJ	-1.55858	3.63e-67	1.02e-65	20917.4	19532.4	6670.06	7062.06
HP1231	-1.56521	3.08e-21	1.5e-20	631.032	549.708	201.738	197.404
HP0546a	-1.59045	1.18e-15	4.34e-15	488.895	392.649	167.88	125.115
rpsP	-1.5909	2.92e-20	1.37e-19	500.568	482.291	165.059	161.26
HP0506	-1.60274	5.91e-36	5.84e-35	1325.92	1217.21	420.406	417.051
HP1496	-1.60675	4.1e-60	9.64e-59	4650.69	4551.02	1565.94	1455.51
oorD	-1.60685	3.25e-38	3.66e-37	1642.47	1523.18	554.428	485.169
HP1441	-1.61113	2.34e-48	3.54e-47	2708.15	2464.06	861.973	831.321
HP1173	-1.61178	4.93e-37	5.2e-36	3180.57	4121.33	1175.16	1213.62
rplM	-1.61697	1.28e-50	2.15e-49	3550.67	4021.32	1193.5	1274.79
secE	-1.64343	3.14e-58	7.16e-57	3721.65	3474.57	1148.36	1155.23
rplS	-1.64723	9.63e-48	1.41e-46	2784.37	2452.94	850.687	821.59
HP0637	-1.64904	1.07e-44	1.42e-43	1839.54	1995.84	636.252	586.651
rpsM	-1.69916	5.09e-58	1.13e-56	4222.22	3924.26	1327.52	1181.64
HP1150	-1.6992	5.76e-56	1.14e-54	3353.6	3656.82	1024.21	1134.38
omp17	-1.70246	6.5e-69	1.93e-67	4941.14	5143.7	1510.92	1587.57
HP1485	-1.73167	1.85e-08	4.47e-08	146.943	131.871	35.269	48.6559
gidB	-1.73487	5.69e-12	1.67e-11	239.641	207.437	57.8411	76.4593
HP0645	-1.74845	2.55e-51	4.39e-50	2138.92	2087.71	670.11	588.042
HP0466	-1.7566	3.27e-44	4.21e-43	1428.23	1367.6	396.423	430.953
HP0490	-1.77279	1.21e-57	2.57e-56	2226.81	2324.04	658.824	672.842
HP0592	-1.78468	2.35e-57	4.84e-56	4071.15	3487.91	1076.41	1117.7
HP1198a	-1.81013	7.86e-43	9.96e-42	1163.87	1198.69	348.457	325.3
HP1065	-1.86646	3.63e-20	1.69e-19	404.437	366.719	117.093	94.5315
rpmH	-1.88165	3.14e-30	2.48e-29	610.433	648.982	174.934	166.82
HP1450	-1.89479	2.33e-74	8.04e-73	5015.98	4666.59	1231.59	1372.1
HP1286	-1.94147	9.8e-85	4.54e-83	8187.62	9249.47	2231.82	2307.68
rpmB	-1.95384	1.47e-54	2.76e-53	1518.19	1454.28	373.851	393.418
HP0069	-2.01157	8.79e-81	3.62e-79	3335.06	3343.44	792.846	863.295
rplT	-2.02673	3.23e-60	7.73e-59	4241.44	3374.56	914.171	955.046
rpsO	-2.03048	6.86e-61	1.67e-59	2136.86	1914.35	523.391	468.487
HP0574	-2.03455	7.29e-32	6.18e-31	585.713	567.488	143.897	137.627
HP1076	-2.05519	2.65e-17	1.07e-16	259.554	258.555	67.7164	56.9969
HP0308	-2.06115	5.81e-20	2.69e-19	425.724	328.195	104.396	76.4593
rimM	-2.09065	3.97e-71	1.28e-69	2146.47	2016.58	486.712	490.73
rpmF	-2.17799	2.62e-78	9.97e-77	2931.31	2895.97	585.465	702.036
rpmJ	-2.19377	2.69e-24	1.58e-23	455.25	403.761	115.682	72.2888
infA	-2.20811	2.85e-62	7.17e-61	1546.34	1397.24	313.188	323.909
HP0247	-2.23483	1.92e-116	2.19e-114	5849.58	6168.29	1290.84	1262.27
HP0174a	-2.28997	5.79e-09	1.45e-08	97.5044	108.164	26.8044	15.2919
HP0827	-2.42634	2.5e-95	1.49e-93	2362.08	2289.22	421.817	443.464
rpmA	-2.5573	3.73e-50	6.14e-49	845.954	736.401	138.254	130.676
prfA	-2.61443	1.26e-143	2.92e-141	7936.31	7178.8	1187.86	1280.35
rpsJ	-2.61833	5.78e-115	6.12e-113	4401.43	5194.82	767.452	795.177
rpmI	-2.79977	1.38e-143	2.92e-141	5289.27	4685.85	719.487	713.157
HP1524	-2.82062	2.49e-81	1.06e-79	1646.59	1409.09	201.738	230.768
HP1064	-3.06288	3.96e-30	3.11e-29	379.718	298.561	38.0905	43.0953
rplU	-3.11853	2.77e-96	1.71e-94	1412.44	1360.94	169.291	150.138
